# Supplementary material for: Comparative Analysis of TOPSIS and TODIM for the Performance Evaluation of Foreign Players in Indian Premier League
Source: Hindawi journal article supplement (doi:10.1155/2022/9986137), 2022-01-01
Supplement: f1 [file 9986137.f1.pdf]

# TOPSIS Ranking

May 28, 2021

## 1 TOPSIS Ranking

```
[1]: import numpy as np           # for linear algebra
import pandas as pd             # for tabular output
from scipy.stats import rankdata # for ranking the candidates
```

### 1.1 Step 0 - Obtaining and processing the data

The data from the Excel sheet is saved into CSV files and stored in the **data** folder at the root of the project. The criteria, their rankings, the players' scores based on the mentioned criteria are stored in Numpy arrays and processed for the next step.

Note that an attribute can be beneficial attribute (in which case, we will want to maximize it's contribution) or a cost attribute (which we will need to minimize). We call the set of beneficial attributes  $J_1$  and that of cost attributes  $J_2 = J_1^C$ .

```
[2]: bowlers_data = {
      'weights': '../data/bowling_criteria.csv',
      'scores': '../data/bowlers.csv',
    }
batsmen_data = {
      'weights': '../data/batting_criteria.csv',
      'scores': '../data/batsmen.csv',
    }
data = batsmen_data
```

```
[3]: attributes_data = pd.read_csv(data['weights'])
attributes_data
```

```
[3]:
```

|   | Name | Ranking | Ideally |
|---|------|---------|---------|
| 0 | SR   | 1       | Higher  |
| 1 | Avg  | 2       | Higher  |
| 2 | Runs | 3       | Higher  |
| 3 | Inn  | 4       | Higher  |
| 4 | NO   | 5       | Higher  |
| 5 | 6s   | 6       | Higher  |
| 6 | 4s   | 7       | Higher  |
| 7 | 100s | 8       | Higher  |

|    |     |    |        |
|----|-----|----|--------|
| 8  | 50s | 9  | Higher |
| 9  | Mat | 10 | Higher |
| 10 | HS  | 11 | Higher |
| 11 | BF  | 12 | Higher |

```
[4]: benefit_attributes = set()
attributes = []
ranks = []
n = 0

for i, row in attributes_data.iterrows():
    attributes.append(row['Name'])
    ranks.append(float(row['Ranking']))
    n += 1

    if row['Ideally'] == 'Higher':
        benefit_attributes.add(i)

ranks = np.array(ranks)
```

```
[5]: weights = 2 * (n + 1 - ranks) / (n * (n + 1))
pd.DataFrame(data=weights, index=attributes, columns=['Weight'])
```

```
[5]:
```

|      | Weight   |
|------|----------|
| SR   | 0.153846 |
| Avg  | 0.141026 |
| Runs | 0.128205 |
| Inn  | 0.115385 |
| NO   | 0.102564 |
| 6s   | 0.089744 |
| 4s   | 0.076923 |
| 100s | 0.064103 |
| 50s  | 0.051282 |
| Mat  | 0.038462 |
| HS   | 0.025641 |
| BF   | 0.012821 |

```
[6]: original_dataframe = pd.read_csv(data['scores'])
candidates = original_dataframe['Name'].to_numpy()
raw_data = pd.DataFrame(original_dataframe, columns=attributes).to_numpy()

dimensions = raw_data.shape
m = dimensions[0]
n = dimensions[1]

pd.DataFrame(data=raw_data, index=candidates, columns=attributes)
```

```
[6]:
```

|                 | SR     | Avg   | Runs  | Inn  | NO  | 6s   | 4s   | 100s | 50s | Mat  | \ |
|-----------------|--------|-------|-------|------|-----|------|------|------|-----|------|---|
| AB de Villiers  | 154.00 | 44.20 | 442.0 | 13.0 | 3.0 | 26.0 | 31.0 | 0.0  | 5.0 | 13.0 |   |
| Andre Russel    | 204.81 | 56.67 | 510.0 | 13.0 | 4.0 | 52.0 | 31.0 | 0.0  | 4.0 | 14.0 |   |
| Ben Stokes      | 124.24 | 20.50 | 123.0 | 9.0  | 3.0 | 4.0  | 8.0  | 0.0  | 0.0 | 9.0  |   |
| Chris Gayle     | 153.60 | 40.83 | 490.0 | 13.0 | 1.0 | 34.0 | 45.0 | 0.0  | 4.0 | 13.0 |   |
| Chris Lynn      | 139.65 | 31.15 | 405.0 | 13.0 | 0.0 | 22.0 | 41.0 | 0.0  | 4.0 | 13.0 |   |
| David Warner    | 143.86 | 69.20 | 692.0 | 12.0 | 2.0 | 21.0 | 57.0 | 1.0  | 8.0 | 12.0 |   |
| Faf Du Plessis  | 123.36 | 36.00 | 396.0 | 12.0 | 1.0 | 15.0 | 36.0 | 0.0  | 3.0 | 12.0 |   |
| Jonny Bairstow  | 157.24 | 55.63 | 445.0 | 10.0 | 2.0 | 18.0 | 48.0 | 1.0  | 2.0 | 10.0 |   |
| Jos Buttler     | 151.70 | 38.88 | 311.0 | 8.0  | 0.0 | 14.0 | 38.0 | 0.0  | 3.0 | 8.0  |   |
| Kane Williamson | 120.00 | 22.29 | 156.0 | 9.0  | 2.0 | 5.0  | 12.0 | 0.0  | 1.0 | 9.0  |   |
| Kieron Pollard  | 156.74 | 34.88 | 279.0 | 14.0 | 6.0 | 22.0 | 14.0 | 0.0  | 1.0 | 16.0 |   |
| Marcus Stoinis  | 135.25 | 52.75 | 211.0 | 10.0 | 6.0 | 10.0 | 14.0 | 0.0  | 0.0 | 10.0 |   |
| Moeen Ali       | 165.41 | 27.50 | 220.0 | 10.0 | 2.0 | 17.0 | 16.0 | 0.0  | 2.0 | 11.0 |   |
| Quinton de Kock | 132.91 | 35.27 | 529.0 | 16.0 | 1.0 | 25.0 | 45.0 | 0.0  | 4.0 | 16.0 |   |
| Shane Watson    | 127.56 | 23.41 | 398.0 | 17.0 | 0.0 | 20.0 | 42.0 | 0.0  | 3.0 | 17.0 |   |
| Steve Smith     | 116.00 | 39.88 | 319.0 | 10.0 | 2.0 | 4.0  | 30.0 | 0.0  | 3.0 | 12.0 |   |

|                 | HS    | BF    |
|-----------------|-------|-------|
| AB de Villiers  | 82.0  | 287.0 |
| Andre Russel    | 80.0  | 249.0 |
| Ben Stokes      | 46.0  | 99.0  |
| Chris Gayle     | 99.0  | 319.0 |
| Chris Lynn      | 82.0  | 290.0 |
| David Warner    | 100.0 | 481.0 |
| Faf Du Plessis  | 96.0  | 321.0 |
| Jonny Bairstow  | 114.0 | 283.0 |
| Jos Buttler     | 89.0  | 205.0 |
| Kane Williamson | 70.0  | 130.0 |
| Kieron Pollard  | 83.0  | 178.0 |
| Marcus Stoinis  | 46.0  | 156.0 |
| Moeen Ali       | 66.0  | 133.0 |
| Quinton de Kock | 81.0  | 398.0 |
| Shane Watson    | 96.0  | 312.0 |
| Steve Smith     | 73.0  | 275.0 |

## 1.2 Step 1 - Normalizing the ratings

$$r_{ij} = \frac{x_{ij}}{\sqrt{\sum_{i=1}^m x_{ij}^2}}$$

where  $i = 1, 2, \dots, m$  and  $j = 1, 2, \dots, n$ .

```
[7]:
```

```
divisors = np.empty(n)
for j in range(n):
    column = raw_data[:,j]
    divisors[j] = np.sqrt(column @ column)
```

```
raw_data /= divisors
pd.DataFrame(data=raw_data, index=candidates, columns=attributes)
```

```
[7]:
```

|                 | SR       | Avg      | Runs     | Inn      | NO       | 6s       | \ |
|-----------------|----------|----------|----------|----------|----------|----------|---|
| AB de Villiers  | 0.264163 | 0.266301 | 0.277322 | 0.269260 | 0.264135 | 0.287807 |   |
| Andre Russel    | 0.351320 | 0.341432 | 0.319987 | 0.269260 | 0.352180 | 0.575614 |   |
| Ben Stokes      | 0.213114 | 0.123511 | 0.077173 | 0.186411 | 0.264135 | 0.044278 |   |
| Chris Gayle     | 0.263477 | 0.245997 | 0.307438 | 0.269260 | 0.088045 | 0.376363 |   |
| Chris Lynn      | 0.239548 | 0.187676 | 0.254107 | 0.269260 | 0.000000 | 0.243529 |   |
| David Warner    | 0.246770 | 0.416924 | 0.434178 | 0.248548 | 0.176090 | 0.232460 |   |
| Faf Du Plessis  | 0.211605 | 0.216897 | 0.248460 | 0.248548 | 0.088045 | 0.166043 |   |
| Jonny Bairstow  | 0.269721 | 0.335166 | 0.279204 | 0.207123 | 0.176090 | 0.199251 |   |
| Jos Buttler     | 0.260218 | 0.234249 | 0.195129 | 0.165699 | 0.000000 | 0.154973 |   |
| Kane Williamson | 0.205841 | 0.134295 | 0.097878 | 0.186411 | 0.176090 | 0.055348 |   |
| Kieron Pollard  | 0.268863 | 0.210149 | 0.175052 | 0.289973 | 0.528271 | 0.243529 |   |
| Marcus Stoinis  | 0.232000 | 0.317815 | 0.132387 | 0.207123 | 0.528271 | 0.110695 |   |
| Moeen Ali       | 0.283735 | 0.165685 | 0.138034 | 0.207123 | 0.176090 | 0.188182 |   |
| Quinton de Kock | 0.227987 | 0.212499 | 0.331908 | 0.331397 | 0.088045 | 0.276738 |   |
| Shane Watson    | 0.218809 | 0.141043 | 0.249715 | 0.352110 | 0.000000 | 0.221390 |   |
| Steve Smith     | 0.198980 | 0.240274 | 0.200149 | 0.207123 | 0.176090 | 0.044278 |   |

  

|                 | 4s       | 100s     | 50s      | Mat      | HS       | BF       |
|-----------------|----------|----------|----------|----------|----------|----------|
| AB de Villiers  | 0.222189 | 0.000000 | 0.354441 | 0.260889 | 0.245830 | 0.259994 |
| Andre Russel    | 0.222189 | 0.000000 | 0.283552 | 0.280957 | 0.239834 | 0.225570 |
| Ben Stokes      | 0.057339 | 0.000000 | 0.000000 | 0.180615 | 0.137905 | 0.089684 |
| Chris Gayle     | 0.322533 | 0.000000 | 0.283552 | 0.260889 | 0.296795 | 0.288983 |
| Chris Lynn      | 0.293863 | 0.000000 | 0.283552 | 0.260889 | 0.245830 | 0.262712 |
| David Warner    | 0.408542 | 0.707107 | 0.567105 | 0.240820 | 0.299792 | 0.435740 |
| Faf Du Plessis  | 0.258026 | 0.000000 | 0.212664 | 0.240820 | 0.287801 | 0.290795 |
| Jonny Bairstow  | 0.344035 | 0.707107 | 0.141776 | 0.200683 | 0.341763 | 0.256371 |
| Jos Buttler     | 0.272361 | 0.000000 | 0.212664 | 0.160547 | 0.266815 | 0.185710 |
| Kane Williamson | 0.086009 | 0.000000 | 0.070888 | 0.180615 | 0.209855 | 0.117767 |
| Kieron Pollard  | 0.100344 | 0.000000 | 0.070888 | 0.321094 | 0.248828 | 0.161251 |
| Marcus Stoinis  | 0.100344 | 0.000000 | 0.000000 | 0.200683 | 0.137905 | 0.141321 |
| Moeen Ali       | 0.114678 | 0.000000 | 0.141776 | 0.220752 | 0.197863 | 0.120485 |
| Quinton de Kock | 0.322533 | 0.000000 | 0.283552 | 0.321094 | 0.242832 | 0.360550 |
| Shane Watson    | 0.301031 | 0.000000 | 0.212664 | 0.341162 | 0.287801 | 0.282642 |
| Steve Smith     | 0.215022 | 0.000000 | 0.212664 | 0.240820 | 0.218848 | 0.249123 |

### 1.3 Step 2 - Calculating the Weighted Normalized Ratings

$$v_{ij} = w_j r_{ij}$$

where  $i = 1, 2, \dots, m$  and  $j = 1, 2, \dots, n$ .

```
[8]: raw_data *= weights
pd.DataFrame(data=raw_data, index=candidates, columns=attributes)
```

|                 | SR       | Avg      | Runs     | Inn      | NO       | 6s \     |
|-----------------|----------|----------|----------|----------|----------|----------|
| AB de Villiers  | 0.040640 | 0.037555 | 0.035554 | 0.031068 | 0.027091 | 0.025829 |
| Andre Russel    | 0.054049 | 0.048151 | 0.041024 | 0.031068 | 0.036121 | 0.051658 |
| Ben Stokes      | 0.032787 | 0.017418 | 0.009894 | 0.021509 | 0.027091 | 0.003974 |
| Chris Gayle     | 0.040535 | 0.034692 | 0.039415 | 0.031068 | 0.009030 | 0.033776 |
| Chris Lynn      | 0.036854 | 0.026467 | 0.032578 | 0.031068 | 0.000000 | 0.021855 |
| David Warner    | 0.037965 | 0.058797 | 0.055664 | 0.028679 | 0.018061 | 0.020862 |
| Faf Du Plessis  | 0.032555 | 0.030588 | 0.031854 | 0.028679 | 0.009030 | 0.014901 |
| Jonny Bairstow  | 0.041496 | 0.047267 | 0.035795 | 0.023899 | 0.018061 | 0.017882 |
| Jos Buttler     | 0.040034 | 0.033035 | 0.025017 | 0.019119 | 0.000000 | 0.013908 |
| Kane Williamson | 0.031668 | 0.018939 | 0.012549 | 0.021509 | 0.018061 | 0.004967 |
| Kieron Pollard  | 0.041364 | 0.029636 | 0.022443 | 0.033458 | 0.054182 | 0.021855 |
| Marcus Stoinis  | 0.035692 | 0.044820 | 0.016973 | 0.023899 | 0.054182 | 0.009934 |
| Moeen Ali       | 0.043652 | 0.023366 | 0.017697 | 0.023899 | 0.018061 | 0.016888 |
| Quinton de Kock | 0.035075 | 0.029968 | 0.042552 | 0.038238 | 0.009030 | 0.024835 |
| Shane Watson    | 0.033663 | 0.019891 | 0.032015 | 0.040628 | 0.000000 | 0.019868 |
| Steve Smith     | 0.030612 | 0.033885 | 0.025660 | 0.023899 | 0.018061 | 0.003974 |

  

|                 | 4s       | 100s     | 50s      | Mat      | HS       | BF       |
|-----------------|----------|----------|----------|----------|----------|----------|
| AB de Villiers  | 0.017091 | 0.000000 | 0.018176 | 0.010034 | 0.006303 | 0.003333 |
| Andre Russel    | 0.017091 | 0.000000 | 0.014541 | 0.010806 | 0.006150 | 0.002892 |
| Ben Stokes      | 0.004411 | 0.000000 | 0.000000 | 0.006947 | 0.003536 | 0.001150 |
| Chris Gayle     | 0.024810 | 0.000000 | 0.014541 | 0.010034 | 0.007610 | 0.003705 |
| Chris Lynn      | 0.022605 | 0.000000 | 0.014541 | 0.010034 | 0.006303 | 0.003368 |
| David Warner    | 0.031426 | 0.045327 | 0.029082 | 0.009262 | 0.007687 | 0.005586 |
| Faf Du Plessis  | 0.019848 | 0.000000 | 0.010906 | 0.009262 | 0.007380 | 0.003728 |
| Jonny Bairstow  | 0.026464 | 0.045327 | 0.007271 | 0.007719 | 0.008763 | 0.003287 |
| Jos Buttler     | 0.020951 | 0.000000 | 0.010906 | 0.006175 | 0.006841 | 0.002381 |
| Kane Williamson | 0.006616 | 0.000000 | 0.003635 | 0.006947 | 0.005381 | 0.001510 |
| Kieron Pollard  | 0.007719 | 0.000000 | 0.003635 | 0.012350 | 0.006380 | 0.002067 |
| Marcus Stoinis  | 0.007719 | 0.000000 | 0.000000 | 0.007719 | 0.003536 | 0.001812 |
| Moeen Ali       | 0.008821 | 0.000000 | 0.007271 | 0.008490 | 0.005073 | 0.001545 |
| Quinton de Kock | 0.024810 | 0.000000 | 0.014541 | 0.012350 | 0.006226 | 0.004622 |
| Shane Watson    | 0.023156 | 0.000000 | 0.010906 | 0.013122 | 0.007380 | 0.003624 |
| Steve Smith     | 0.016540 | 0.000000 | 0.010906 | 0.009262 | 0.005611 | 0.003194 |

### 1.4 Step 3 - Identifying PIS ( $A^*$ ) and NIS ( $A^-$ )

$$A^* = \{v_1^*, v_2^*, \dots, v_n^*\}$$

$$A^- = \{v_1^-, v_2^-, \dots, v_n^-\}$$

And we define

$$v_j^* = \max(v_{ij}), \text{ if } j \in J_1$$

$$v_j^* = \min(v_{ij}), \text{ if } j \in J_2$$

$$v_j^- = \min(v_{ij}), \text{ if } j \in J_1$$

$$v_j^- = \max(v_{ij}), \text{ if } j \in J_2$$

where  $i = 1, 2, \dots, m$  and  $j = 1, 2, \dots, n$ .

```
[9]: a_pos = np.zeros(n)
a_neg = np.zeros(n)
for j in range(n):
    column = raw_data[:,j]
    max_val = np.max(column)
    min_val = np.min(column)

    # See if we want to maximize benefit or minimize cost (for PIS)
    if j in benefit_attributes:
        a_pos[j] = max_val
        a_neg[j] = min_val
    else:
        a_pos[j] = min_val
        a_neg[j] = max_val

pd.DataFrame(data=[a_pos, a_neg], index=["$A^*$", "$A^-"], columns=attributes)
```

```
[9]:
```

|         | SR       | Avg      | Runs     | Inn      | NO       | 6s       | 4s \     |
|---------|----------|----------|----------|----------|----------|----------|----------|
| \$A^*\$ | 0.054049 | 0.058797 | 0.055664 | 0.040628 | 0.054182 | 0.051658 | 0.031426 |
| \$A^-   | 0.030612 | 0.017418 | 0.009894 | 0.019119 | 0.000000 | 0.003974 | 0.004411 |

  

|         | 100s     | 50s      | Mat      | HS       | BF       |
|---------|----------|----------|----------|----------|----------|
| \$A^*\$ | 0.045327 | 0.029082 | 0.013122 | 0.008763 | 0.005586 |
| \$A^-   | 0.000000 | 0.000000 | 0.006175 | 0.003536 | 0.001150 |

## 1.5 Step 4 and 5 - Calculating Separation Measures and Similarities to PIS

The separation or distance between the alternatives can be measured by the  $n$ -dimensional Euclidean distance. The separation from the PIS  $A^*$  and NIS  $A^-$  are  $S^*$  and  $S^-$  respectively.

$$S_i^* = \sqrt{\sum_{j=1}^n (v_{ij} - v_j^*)^2}$$

$$S_i^- = \sqrt{\sum_{j=1}^n (v_{ij} - v_j^-)^2}$$

where  $i = 1, 2, \dots, m$  and  $j = 1, 2, \dots, n$ .

We also calculate

$$C_i^* = \frac{S_i^-}{S_i^* + S_i^-}, \text{ where } i = 1, 2, \dots, m$$

```
[10]: sp = np.zeros(m)
sn = np.zeros(m)
cs = np.zeros(m)

for i in range(m):
    diff_pos = raw_data[i] - a_pos
    diff_neg = raw_data[i] - a_neg
    sp[i] = np.sqrt(diff_pos @ diff_pos)
    sn[i] = np.sqrt(diff_neg @ diff_neg)
    cs[i] = sn[i] / (sp[i] + sn[i])

pd.DataFrame(data=zip(sp, sn, cs), index=candidates, columns=["$S^*$$", "$S^-$$", "$C^*$$", "$C^-$$"])
```

```
[10]:
```

|                 | \$S^*\$\$ | \$S^-\$\$ | \$C^*\$\$ |
|-----------------|-----------|-----------|-----------|
| AB de Villiers  | 0.070196  | 0.055112  | 0.439813  |
| Andre Russel    | 0.056888  | 0.081165  | 0.587927  |
| Ben Stokes      | 0.106526  | 0.027294  | 0.203959  |
| Chris Gayle     | 0.076169  | 0.055195  | 0.420169  |
| Chris Lynn      | 0.090296  | 0.040840  | 0.311430  |
| David Warner    | 0.051679  | 0.090778  | 0.637231  |
| Faf Du Plessis  | 0.088862  | 0.036606  | 0.291756  |
| Jonny Bairstow  | 0.062814  | 0.069648  | 0.525796  |
| Jos Buttler     | 0.095810  | 0.032634  | 0.254072  |
| Kane Williamson | 0.105748  | 0.019120  | 0.153120  |
| Kieron Pollard  | 0.079607  | 0.062885  | 0.441323  |
| Marcus Stoinis  | 0.087082  | 0.061924  | 0.415581  |
| Moeen Ali       | 0.093227  | 0.029365  | 0.239533  |
| Quinton de Kock | 0.080278  | 0.053022  | 0.397761  |
| Shane Watson    | 0.094307  | 0.041946  | 0.307855  |
| Steve Smith     | 0.092551  | 0.033953  | 0.268397  |

## 1.6 Step 6 - Ranking the candidates/alternatives

We choose the candidate with the maximum  $C^*$  or rank all the alternatives in descending order according to their  $C^*$  values. This process can also be done for the  $S^*$  and  $S^-$  values.

```
[11]: def rank_according_to(data):
    ranks = (rankdata(data) - 1).astype(int)
    storage = np.zeros_like(candidates)
    storage[ranks] = candidates
    return storage[:, -1]
```

```
[12]: cs_order = rank_according_to(cs)
      sp_order = rank_according_to(sp)
      sn_order = rank_according_to(sn)

      pd.DataFrame(data=zip(cs_order, sp_order[::-1], sn_order), index=range(1, m +
      ↪1),
                  columns=["$C*$", "$S*$", "$S~-$"])
```

```
[12]:          $C*$          $S*$          $S~-$
1      David Warner      David Warner      David Warner
2      Andre Russel      Andre Russel      Andre Russel
3      Jonny Bairstow      Jonny Bairstow      Jonny Bairstow
4      Kieron Pollard      AB de Villiers      Kieron Pollard
5      AB de Villiers      Chris Gayle      Marcus Stoinis
6      Chris Gayle      Kieron Pollard      Chris Gayle
7      Marcus Stoinis      Quinton de Kock      AB de Villiers
8      Quinton de Kock      Marcus Stoinis      Quinton de Kock
9      Chris Lynn      Faf Du Plessis      Shane Watson
10     Shane Watson      Chris Lynn      Chris Lynn
11     Faf Du Plessis      Steve Smith      Faf Du Plessis
12     Steve Smith      Moeen Ali      Steve Smith
13     Jos Buttler      Shane Watson      Jos Buttler
14     Moeen Ali      Jos Buttler      Moeen Ali
15     Ben Stokes      Kane Williamson      Ben Stokes
16     Kane Williamson      Ben Stokes      Kane Williamson
```

```
[13]: print("The best candidate/alternative according to C* is " + cs_order[0])
      print("The preferences in descending order are " + ", ".join(cs_order) + ".")
```

The best candidate/alternative according to C\* is David Warner  
 The preferences in descending order are David Warner, Andre Russel, Jonny Bairstow, Kieron Pollard, AB de Villiers, Chris Gayle, Marcus Stoinis, Quinton de Kock, Chris Lynn, Shane Watson, Faf Du Plessis, Steve Smith, Jos Buttler, Moeen Ali, Ben Stokes, Kane Williamson.



# TOPSIS Ranking

May 28, 2021

## 1 TOPSIS Ranking

```
[1]: import numpy as np           # for linear algebra
import pandas as pd           # for tabular output
from scipy.stats import rankdata # for ranking the candidates
```

### 1.1 Step 0 - Obtaining and processing the data

The data from the Excel sheet is saved into CSV files and stored in the **data** folder at the root of the project. The criteria, their rankings, the players' scores based on the mentioned criteria are stored in Numpy arrays and processed for the next step.

Note that an attribute can be beneficial attribute (in which case, we will want to maximize it's contribution) or a cost attribute (which we will need to minimize). We call the set of beneficial attributes  $J_1$  and that of cost attributes  $J_2 = J_1^C$ .

```
[2]: bowlers_data = {
    'weights': '../data/bowling_criteria.csv',
    'scores': '../data/bowlers.csv',
}
batsmen_data = {
    'weights': '../data/batting_criteria.csv',
    'scores': '../data/batsmen.csv',
}
data = bowlers_data
```

```
[3]: attributes_data = pd.read_csv(data['weights'])
attributes_data
```

```
[3]:
```

|   | Name | Ranking | Ideally |
|---|------|---------|---------|
| 0 | SR   | 1       | Lower   |
| 1 | Econ | 2       | Lower   |
| 2 | Avg  | 3       | Lower   |
| 3 | Wkts | 4       | Higher  |
| 4 | Runs | 5       | Lower   |
| 5 | Inns | 6       | Higher  |
| 6 | TBB  | 7       | Higher  |
| 7 | 4w   | 8       | Higher  |

8 Mat            9 Higher

```
[4]: benefit_attributes = set()
attributes = []
ranks = []
n = 0

for i, row in attributes_data.iterrows():
    attributes.append(row['Name'])
    ranks.append(float(row['Ranking']))
    n += 1

    if row['Ideally'] == 'Higher':
        benefit_attributes.add(i)

ranks = np.array(ranks)
```

```
[5]: weights = 2 * (n + 1 - ranks) / (n * (n + 1))
pd.DataFrame(data=weights, index=attributes, columns=['Weight'])
```

```
[5]:          Weight
SR      0.200000
Econ    0.177778
Avg     0.155556
Wkts    0.133333
Runs    0.111111
Inns    0.088889
TBB     0.066667
4w      0.044444
Mat     0.022222
```

```
[6]: original_dataframe = pd.read_csv(data['scores'])
candidates = original_dataframe['Name'].to_numpy()
raw_data = pd.DataFrame(original_dataframe, columns=attributes).to_numpy()

dimensions = raw_data.shape
m = dimensions[0]
n = dimensions[1]

pd.DataFrame(data=raw_data, index=candidates, columns=attributes)
```

```
[6]:          SR   Econ   Avg  Wkts  Runs  Inns   TBB   4w  Mat
Andre Russell  16.45   9.51  26.09  11.0  287.0  12.0  181.0  0.0  14.0
Ben Stokes     16.83  11.23  31.50   6.0  189.0   6.0  101.0  0.0   9.0
Chris Morris   15.23   9.27  23.54  13.0  306.0   9.0  198.0  0.0   9.0
Dwayne Bravo   22.45   8.02  30.00  11.0  330.0  12.0  247.0  0.0  12.0
Imran Tahir    14.85   6.70  16.58  26.0  431.0  17.0  386.0  2.0  17.0
```

|                |       |      |       |      |       |      |       |     |      |
|----------------|-------|------|-------|------|-------|------|-------|-----|------|
| Jofra Archer   | 23.45 | 6.77 | 26.45 | 11.0 | 291.0 | 11.0 | 258.0 | 0.0 | 11.0 |
| Kagiso Rabada  | 11.28 | 7.83 | 14.72 | 25.0 | 368.0 | 12.0 | 282.0 | 2.0 | 12.0 |
| Keemo Paul     | 18.11 | 8.72 | 26.33 | 9.0  | 237.0 | 8.0  | 163.0 | 0.0 | 8.0  |
| Lasith Malinga | 16.81 | 9.77 | 27.38 | 16.0 | 438.0 | 12.0 | 269.0 | 2.0 | 12.0 |
| Moeen Ali      | 25.00 | 6.76 | 28.17 | 6.0  | 169.0 | 9.0  | 150.0 | 0.0 | 11.0 |
| Mohammad Nabi  | 21.88 | 6.65 | 24.25 | 8.0  | 194.0 | 8.0  | 175.0 | 1.0 | 8.0  |
| Rashid Khan    | 21.18 | 6.28 | 22.18 | 17.0 | 377.0 | 15.0 | 360.0 | 0.0 | 15.0 |
| Sam Curran     | 19.80 | 9.79 | 32.30 | 10.0 | 323.0 | 9.0  | 198.0 | 1.0 | 9.0  |
| Sunil Narine   | 26.60 | 7.83 | 34.70 | 10.0 | 347.0 | 12.0 | 266.0 | 0.0 | 12.0 |
| Trent Boult    | 22.80 | 8.58 | 32.60 | 5.0  | 163.0 | 5.0  | 114.0 | 0.0 | 5.0  |

## 1.2 Step 1 - Normalizing the ratings

$$r_{ij} = \frac{x_{ij}}{\sqrt{\sum_{i=1}^m x_{ij}^2}}$$

where  $i = 1, 2, \dots, m$  and  $j = 1, 2, \dots, n$ .

```
[7]: divisors = np.empty(n)
      for j in range(n):
          column = raw_data[:,j]
          divisors[j] = np.sqrt(column @ column)

      raw_data /= divisors
      pd.DataFrame(data=raw_data, index=candidates, columns=attributes)
```

```
[7]:
```

|                | SR       | Econ     | Avg      | Wkts     | Runs     | Inns \   |
|----------------|----------|----------|----------|----------|----------|----------|
| Andre Russell  | 0.212905 | 0.293421 | 0.249384 | 0.207142 | 0.239655 | 0.283870 |
| Ben Stokes     | 0.217824 | 0.346490 | 0.301096 | 0.112987 | 0.157822 | 0.141935 |
| Chris Morris   | 0.197115 | 0.286016 | 0.225010 | 0.244804 | 0.255521 | 0.212902 |
| Dwayne Bravo   | 0.290561 | 0.247449 | 0.286758 | 0.207142 | 0.275561 | 0.283870 |
| Imran Tahir    | 0.192197 | 0.206721 | 0.158482 | 0.489608 | 0.359900 | 0.402149 |
| Jofra Archer   | 0.303503 | 0.208881 | 0.252825 | 0.207142 | 0.242995 | 0.260214 |
| Kagiso Rabada  | 0.145992 | 0.241586 | 0.140703 | 0.470777 | 0.307293 | 0.283870 |
| Keemo Paul     | 0.234390 | 0.269046 | 0.251678 | 0.169480 | 0.197903 | 0.189246 |
| Lasith Malinga | 0.217565 | 0.301443 | 0.261715 | 0.301297 | 0.365745 | 0.283870 |
| Moeen Ali      | 0.323564 | 0.208573 | 0.269266 | 0.112987 | 0.141121 | 0.212902 |
| Mohammad Nabi  | 0.283184 | 0.205179 | 0.231796 | 0.150649 | 0.161997 | 0.189246 |
| Rashid Khan    | 0.274124 | 0.193763 | 0.212010 | 0.320129 | 0.314808 | 0.354837 |
| Sam Curran     | 0.256263 | 0.302060 | 0.308743 | 0.188311 | 0.269716 | 0.212902 |
| Sunil Narine   | 0.344272 | 0.241586 | 0.331684 | 0.188311 | 0.289757 | 0.283870 |
| Trent Boult    | 0.295091 | 0.264727 | 0.311610 | 0.094155 | 0.136111 | 0.118279 |

  

|               | TBB      | 4w       | Mat      |
|---------------|----------|----------|----------|
| Andre Russell | 0.197151 | 0.000000 | 0.319173 |
| Ben Stokes    | 0.110012 | 0.000000 | 0.205182 |
| Chris Morris  | 0.215668 | 0.000000 | 0.205182 |

|                |          |          |          |
|----------------|----------|----------|----------|
| Dwayne Bravo   | 0.269040 | 0.000000 | 0.273576 |
| Imran Tahir    | 0.420443 | 0.534522 | 0.387567 |
| Jofra Archer   | 0.281021 | 0.000000 | 0.250778 |
| Kagiso Rabada  | 0.307163 | 0.534522 | 0.273576 |
| Keemo Paul     | 0.177545 | 0.000000 | 0.182384 |
| Lasith Malinga | 0.293003 | 0.534522 | 0.273576 |
| Moeen Ali      | 0.163385 | 0.000000 | 0.250778 |
| Mohammad Nabi  | 0.190615 | 0.267261 | 0.182384 |
| Rashid Khan    | 0.392123 | 0.000000 | 0.341971 |
| Sam Curran     | 0.215668 | 0.267261 | 0.205182 |
| Sunil Narine   | 0.289735 | 0.000000 | 0.273576 |
| Trent Boult    | 0.124172 | 0.000000 | 0.113990 |

### 1.3 Step 2 - Calculating the Weighted Normalized Ratings

$$v_{ij} = w_j r_{ij}$$

where  $i = 1, 2, \dots, m$  and  $j = 1, 2, \dots, n$ .

```
[8]: raw_data *= weights
pd.DataFrame(data=raw_data, index=candidates, columns=attributes)
```

```
[8]:
```

|                | SR       | Econ     | Avg      | Wkts     | Runs     | Inns     | \ |
|----------------|----------|----------|----------|----------|----------|----------|---|
| Andre Russell  | 0.042581 | 0.052164 | 0.038793 | 0.027619 | 0.026628 | 0.025233 |   |
| Ben Stokes     | 0.043565 | 0.061598 | 0.046837 | 0.015065 | 0.017536 | 0.012616 |   |
| Chris Morris   | 0.039423 | 0.050847 | 0.035001 | 0.032641 | 0.028391 | 0.018925 |   |
| Dwayne Bravo   | 0.058112 | 0.043991 | 0.044607 | 0.027619 | 0.030618 | 0.025233 |   |
| Imran Tahir    | 0.038439 | 0.036750 | 0.024653 | 0.065281 | 0.039989 | 0.035747 |   |
| Jofra Archer   | 0.060701 | 0.037134 | 0.039328 | 0.027619 | 0.026999 | 0.023130 |   |
| Kagiso Rabada  | 0.029198 | 0.042949 | 0.021887 | 0.062770 | 0.034144 | 0.025233 |   |
| Keemo Paul     | 0.046878 | 0.047830 | 0.039150 | 0.022597 | 0.021989 | 0.016822 |   |
| Lasith Malinga | 0.043513 | 0.053590 | 0.040711 | 0.040173 | 0.040638 | 0.025233 |   |
| Moeen Ali      | 0.064713 | 0.037080 | 0.041886 | 0.015065 | 0.015680 | 0.018925 |   |
| Mohammad Nabi  | 0.056637 | 0.036476 | 0.036057 | 0.020086 | 0.018000 | 0.016822 |   |
| Rashid Khan    | 0.054825 | 0.034447 | 0.032979 | 0.042684 | 0.034979 | 0.031541 |   |
| Sam Curran     | 0.051253 | 0.053700 | 0.048027 | 0.025108 | 0.029968 | 0.018925 |   |
| Sunil Narine   | 0.068854 | 0.042949 | 0.051595 | 0.025108 | 0.032195 | 0.025233 |   |
| Trent Boult    | 0.059018 | 0.047063 | 0.048473 | 0.012554 | 0.015123 | 0.010514 |   |

  

|               | TBB      | 4w       | Mat      |
|---------------|----------|----------|----------|
| Andre Russell | 0.013143 | 0.000000 | 0.007093 |
| Ben Stokes    | 0.007334 | 0.000000 | 0.004560 |
| Chris Morris  | 0.014378 | 0.000000 | 0.004560 |
| Dwayne Bravo  | 0.017936 | 0.000000 | 0.006079 |
| Imran Tahir   | 0.028030 | 0.023757 | 0.008613 |
| Jofra Archer  | 0.018735 | 0.000000 | 0.005573 |
| Kagiso Rabada | 0.020478 | 0.023757 | 0.006079 |

|                |          |          |          |
|----------------|----------|----------|----------|
| Keemo Paul     | 0.011836 | 0.000000 | 0.004053 |
| Lasith Malinga | 0.019534 | 0.023757 | 0.006079 |
| Moeen Ali      | 0.010892 | 0.000000 | 0.005573 |
| Mohammad Nabi  | 0.012708 | 0.011878 | 0.004053 |
| Rashid Khan    | 0.026142 | 0.000000 | 0.007599 |
| Sam Curran     | 0.014378 | 0.011878 | 0.004560 |
| Sunil Narine   | 0.019316 | 0.000000 | 0.006079 |
| Trent Boult    | 0.008278 | 0.000000 | 0.002533 |

#### 1.4 Step 3 - Identifying PIS ( $A^*$ ) and NIS ( $A^-$ )

$$A^* = \{v_1^*, v_2^*, \dots, v_n^*\}$$

$$A^- = \{v_1^-, v_2^-, \dots, v_n^-\}$$

And we define

$$v_j^* = \max(v_{ij}), \text{ if } j \in J_1$$

$$v_j^* = \min(v_{ij}), \text{ if } j \in J_2$$

$$v_j^- = \min(v_{ij}), \text{ if } j \in J_1$$

$$v_j^- = \max(v_{ij}), \text{ if } j \in J_2$$

where  $i = 1, 2, \dots, m$  and  $j = 1, 2, \dots, n$ .

```
[9]: a_pos = np.zeros(n)
a_neg = np.zeros(n)
for j in range(n):
    column = raw_data[:,j]
    max_val = np.max(column)
    min_val = np.min(column)

    # See if we want to maximize benefit or minimize cost (for PIS)
    if j in benefit_attributes:
        a_pos[j] = max_val
        a_neg[j] = min_val
    else:
        a_pos[j] = min_val
        a_neg[j] = max_val

pd.DataFrame(data=[a_pos, a_neg], index=["$A^*$$", "$A^-$$"], columns=attributes)
```

```
[9]:          SR      Econ      Avg      Wkts      Runs      Inns      TBB  \
$A^*$$  0.029198  0.034447  0.021887  0.065281  0.015123  0.035747  0.028030
$A^-$$  0.068854  0.061598  0.051595  0.012554  0.040638  0.010514  0.007334

          4w      Mat
$A^*$$  0.023757  0.008613
```

$A^-$  0.000000 0.002533

## 1.5 Step 4 and 5 - Calculating Separation Measures and Similarities to PIS

The separation or distance between the alternatives can be measured by the  $n$ -dimensional Euclidean distance. The separation from the PIS  $A^*$  and NIS  $A^-$  are  $S^*$  and  $S^-$  respectively.

$$S_i^* = \sqrt{\sum_{j=1}^n (v_{ij} - v_j^*)^2}$$
$$S_i^- = \sqrt{\sum_{j=1}^n (v_{ij} - v_j^-)^2}$$

where  $i = 1, 2, \dots, m$  and  $j = 1, 2, \dots, n$ .

We also calculate

$$C_i^* = \frac{S_i^-}{S_i^* + S_i^-}, \text{ where } i = 1, 2, \dots, m$$

```
[10]: sp = np.zeros(m)
sn = np.zeros(m)
cs = np.zeros(m)

for i in range(m):
    diff_pos = raw_data[i] - a_pos
    diff_neg = raw_data[i] - a_neg
    sp[i] = np.sqrt(diff_pos @ diff_pos)
    sn[i] = np.sqrt(diff_neg @ diff_neg)
    cs[i] = sn[i] / (sp[i] + sn[i])

pd.DataFrame(data=zip(sp, sn, cs), index=candidates, columns=["$S^*$$", "$S^-$$",
↪ "$C^*$$"])
```

```
[10]:          $S^*$$    $S^-$$    $C^*$$
Andre Russell    0.056819  0.040468  0.415961
Ben Stokes       0.075085  0.034796  0.316672
Chris Morris     0.053264  0.043989  0.452315
Dwayne Bravo    0.062330  0.033812  0.351688
Imran Tahir      0.026770  0.081947  0.753762
Jofra Archer     0.060683  0.039074  0.391692
Kagiso Rabada    0.024786  0.079581  0.762512
Keemo Paul       0.062163  0.036585  0.370485
Lasith Malinga   0.048952  0.050299  0.506789
Moeen Ali        0.073078  0.037874  0.341355
Mohammad Nabi    0.061346  0.042463  0.409050
```

|              |          |          |          |
|--------------|----------|----------|----------|
| Rashid Khan  | 0.047658 | 0.055154 | 0.536456 |
| Sam Curran   | 0.063257 | 0.030364 | 0.324327 |
| Sunil Narine | 0.072042 | 0.030814 | 0.299582 |
| Trent Boult  | 0.078508 | 0.031140 | 0.284000 |

## 1.6 Step 6 - Ranking the candidates/alternatives

We choose the candidate with the maximum  $C^*$  or rank all the alternatives in descending order according to their  $C^*$  values. This process can also be done for the  $S^*$  and  $S^-$  values.

```
[11]: def rank_according_to(data):
      ranks = (rankdata(data) - 1).astype(int)
      storage = np.zeros_like(candidates)
      storage[ranks] = candidates
      return storage[:, :-1]
```

```
[12]: cs_order = rank_according_to(cs)
      sp_order = rank_according_to(sp)
      sn_order = rank_according_to(sn)

      pd.DataFrame(data=zip(cs_order, sp_order[:, :-1], sn_order), index=range(1, m + 1),
                  columns=["$C^*$", "$S^*$", "$S^-*$"])
```

```
[12]:          $C^*$          $S^*$          $S^-*$
1    Kagiso Rabada    Kagiso Rabada    Imran Tahir
2      Imran Tahir      Imran Tahir    Kagiso Rabada
3      Rashid Khan      Rashid Khan      Rashid Khan
4    Lasith Malinga    Lasith Malinga    Lasith Malinga
5      Chris Morris      Chris Morris      Chris Morris
6    Andre Russell      Andre Russell      Mohammad Nabi
7    Mohammad Nabi      Jofra Archer      Andre Russell
8      Jofra Archer      Mohammad Nabi      Jofra Archer
9      Keemo Paul      Keemo Paul      Moeen Ali
10     Dwayne Bravo      Dwayne Bravo      Keemo Paul
11      Moeen Ali      Sam Curran      Ben Stokes
12     Sam Curran      Sunil Narine      Dwayne Bravo
13     Ben Stokes      Moeen Ali      Trent Boult
14     Sunil Narine      Ben Stokes      Sunil Narine
15     Trent Boult      Trent Boult      Sam Curran
```

```
[13]: print("The best candidate/alternative according to C* is " + cs_order[0])
      print("The preferences in descending order are " + ", ".join(cs_order) + ".")
```

The best candidate/alternative according to  $C^*$  is Kagiso Rabada

The preferences in descending order are Kagiso Rabada, Imran Tahir, Rashid Khan, Lasith Malinga, Chris Morris, Andre Russell, Mohammad Nabi, Jofra Archer, Keemo

Paul, Dwayne Bravo, Moeen Ali, Sam Curran, Ben Stokes, Sunil Narine, Trent  
Boult.



# NR TOPSIS Ranking

August 4, 2021

## 1 TOPSIS Ranking

```
[1]: import numpy as np           # for linear algebra
import pandas as pd           # for tabular output
from scipy.stats import rankdata # for ranking the candidates
```

### 1.1 Step 0 - Obtaining and processing the data

The data from the Excel sheet is saved into CSV files and stored in the `data` folder at the root of the project. The criteria, their rankings, the players' scores based on the mentioned criteria are stored in Numpy arrays and processed for the next step.

Note that an attribute can be beneficial attribute (in which case, we will want to maximize it's contribution) or a cost attribute (which we will need to minimize). We call the set of beneficial attributes  $J_1$  and that of cost attributes  $J_2 = J_1^C$ .

```
[2]: bowlers_data = {
      'weights': '../data/bowling_criteria.csv',
      'scores': '../data/bowlers.csv',
    }
batsmen_data = {
      'weights': '../data/batting_criteria.csv',
      'scores': '../data/batsmen.csv',
    }
data = batsmen_data
```

```
[3]: attributes_data = pd.read_csv(data['weights'])
attributes_data
```

```
[3]:
```

|   | Name | Ranking | Ideally |
|---|------|---------|---------|
| 0 | SR   | 1       | Higher  |
| 1 | Avg  | 2       | Higher  |
| 2 | Runs | 3       | Higher  |
| 3 | Inn  | 4       | Higher  |
| 4 | NO   | 5       | Higher  |
| 5 | 6s   | 6       | Higher  |
| 6 | 4s   | 7       | Higher  |
| 7 | 100s | 8       | Higher  |

|    |     |    |        |
|----|-----|----|--------|
| 8  | 50s | 9  | Higher |
| 9  | Mat | 10 | Higher |
| 10 | HS  | 11 | Higher |
| 11 | BF  | 12 | Higher |

```
[4]: benefit_attributes = set()
attributes = []
ranks = []
n = 0

for i, row in attributes_data.iterrows():
    attributes.append(row['Name'])
    ranks.append(float(row['Ranking']))
    n += 1

    if row['Ideally'] == 'Higher':
        benefit_attributes.add(i)

ranks = np.array(ranks)
```

```
[5]: weights = 2 * (n + 1 - ranks) / (n * (n + 1))
pd.DataFrame(data=weights, index=attributes, columns=['Weight'])
```

```
[5]:
```

|      | Weight   |
|------|----------|
| SR   | 0.153846 |
| Avg  | 0.141026 |
| Runs | 0.128205 |
| Inn  | 0.115385 |
| NO   | 0.102564 |
| 6s   | 0.089744 |
| 4s   | 0.076923 |
| 100s | 0.064103 |
| 50s  | 0.051282 |
| Mat  | 0.038462 |
| HS   | 0.025641 |
| BF   | 0.012821 |

```
[6]: original_dataframe = pd.read_csv(data['scores'])
candidates = original_dataframe['Name'].to_numpy()
raw_data = pd.DataFrame(original_dataframe, columns=attributes).to_numpy()

dimensions = raw_data.shape
m = dimensions[0]
n = dimensions[1]

pd.DataFrame(data=raw_data, index=candidates, columns=attributes)
```

| [6]:            | SR     | Avg   | Runs  | Inn  | NO  | 6s   | 4s   | 100s | 50s | Mat  | \ |
|-----------------|--------|-------|-------|------|-----|------|------|------|-----|------|---|
| AB de Villiers  | 154.00 | 44.20 | 442.0 | 13.0 | 3.0 | 26.0 | 31.0 | 0.0  | 5.0 | 13.0 |   |
| Andre Russel    | 204.81 | 56.67 | 510.0 | 13.0 | 4.0 | 52.0 | 31.0 | 0.0  | 4.0 | 14.0 |   |
| Ben Stokes      | 124.24 | 20.50 | 123.0 | 9.0  | 3.0 | 4.0  | 8.0  | 0.0  | 0.0 | 9.0  |   |
| Chris Gayle     | 153.60 | 40.83 | 490.0 | 13.0 | 1.0 | 34.0 | 45.0 | 0.0  | 4.0 | 13.0 |   |
| Chris Lynn      | 139.65 | 31.15 | 405.0 | 13.0 | 0.0 | 22.0 | 41.0 | 0.0  | 4.0 | 13.0 |   |
| David Warner    | 143.86 | 69.20 | 692.0 | 12.0 | 2.0 | 21.0 | 57.0 | 1.0  | 8.0 | 12.0 |   |
| Faf Du Plessis  | 123.36 | 36.00 | 396.0 | 12.0 | 1.0 | 15.0 | 36.0 | 0.0  | 3.0 | 12.0 |   |
| Jonny Bairstow  | 157.24 | 55.63 | 445.0 | 10.0 | 2.0 | 18.0 | 48.0 | 1.0  | 2.0 | 10.0 |   |
| Jos Buttler     | 151.70 | 38.88 | 311.0 | 8.0  | 0.0 | 14.0 | 38.0 | 0.0  | 3.0 | 8.0  |   |
| Kane Williamson | 120.00 | 22.29 | 156.0 | 9.0  | 2.0 | 5.0  | 12.0 | 0.0  | 1.0 | 9.0  |   |
| Kieron Pollard  | 156.74 | 34.88 | 279.0 | 14.0 | 6.0 | 22.0 | 14.0 | 0.0  | 1.0 | 16.0 |   |
| Marcus Stoinis  | 135.25 | 52.75 | 211.0 | 10.0 | 6.0 | 10.0 | 14.0 | 0.0  | 0.0 | 10.0 |   |
| Moeen Ali       | 165.41 | 27.50 | 220.0 | 10.0 | 2.0 | 17.0 | 16.0 | 0.0  | 2.0 | 11.0 |   |
| Quinton de Kock | 132.91 | 35.27 | 529.0 | 16.0 | 1.0 | 25.0 | 45.0 | 0.0  | 4.0 | 16.0 |   |
| Shane Watson    | 127.56 | 23.41 | 398.0 | 17.0 | 0.0 | 20.0 | 42.0 | 0.0  | 3.0 | 17.0 |   |
| Steve Smith     | 116.00 | 39.88 | 319.0 | 10.0 | 2.0 | 4.0  | 30.0 | 0.0  | 3.0 | 12.0 |   |

|                 | HS    | BF    |
|-----------------|-------|-------|
| AB de Villiers  | 82.0  | 287.0 |
| Andre Russel    | 80.0  | 249.0 |
| Ben Stokes      | 46.0  | 99.0  |
| Chris Gayle     | 99.0  | 319.0 |
| Chris Lynn      | 82.0  | 290.0 |
| David Warner    | 100.0 | 481.0 |
| Faf Du Plessis  | 96.0  | 321.0 |
| Jonny Bairstow  | 114.0 | 283.0 |
| Jos Buttler     | 89.0  | 205.0 |
| Kane Williamson | 70.0  | 130.0 |
| Kieron Pollard  | 83.0  | 178.0 |
| Marcus Stoinis  | 46.0  | 156.0 |
| Moeen Ali       | 66.0  | 133.0 |
| Quinton de Kock | 81.0  | 398.0 |
| Shane Watson    | 96.0  | 312.0 |
| Steve Smith     | 73.0  | 275.0 |

## 1.2 Step 1 - Normalizing the ratings

$$r_{ij} = \frac{x_{ij}}{\sqrt{\sum_{i=1}^m x_{ij}^2}}$$

where  $i = 1, 2, \dots, m$  and  $j = 1, 2, \dots, n$ .

```
[7]: for j in range(n):
      column = raw_data[:,j]
      min_val = np.min(column)
      max_val = np.max(column)
      denom = max_val - min_val
```

```

if j in benefit_attributes:
    raw_data[:,j] = (raw_data[:,j] - min_val) / denom
else:
    raw_data[:,j] = (max_val - raw_data[:,j]) / denom

pd.DataFrame(data=raw_data, index=candidates, columns=attributes)

```

```

[7]:
      SR      Avg      Runs      Inn      NO      6s \
AB de Villiers  0.427880  0.486653  0.560633  0.555556  0.500000  0.458333
Andre Russel    1.000000  0.742710  0.680141  0.555556  0.666667  1.000000
Ben Stokes      0.092782  0.000000  0.000000  0.111111  0.500000  0.000000
Chris Gayle     0.423376  0.417454  0.644991  0.555556  0.166667  0.625000
Chris Lynn      0.266299  0.218686  0.495606  0.555556  0.000000  0.375000
David Warner    0.313703  1.000000  1.000000  0.444444  0.333333  0.354167
Faf Du Plessis  0.082874  0.318275  0.479789  0.444444  0.166667  0.229167
Jonny Bairstow  0.464362  0.721355  0.565905  0.222222  0.333333  0.291667
Jos Buttler     0.401982  0.377413  0.330404  0.000000  0.000000  0.208333
Kane Williamson 0.045040  0.036756  0.057996  0.111111  0.333333  0.020833
Kieron Pollard  0.458732  0.295277  0.274165  0.666667  1.000000  0.375000
Marcus Stoinis  0.216755  0.662218  0.154657  0.222222  1.000000  0.125000
Moeen Ali       0.556356  0.143737  0.170475  0.222222  0.333333  0.270833
Quinton de Kock 0.190406  0.303285  0.713533  0.888889  0.166667  0.437500
Shane Watson    0.130166  0.059754  0.483304  1.000000  0.000000  0.333333
Steve Smith     0.000000  0.397947  0.344464  0.222222  0.333333  0.000000

      4s  100s  50s      Mat      HS      BF
AB de Villiers  0.469388  0.0  0.625  0.555556  0.529412  0.492147
Andre Russel    0.469388  0.0  0.500  0.666667  0.500000  0.392670
Ben Stokes      0.000000  0.0  0.000  0.111111  0.000000  0.000000
Chris Gayle     0.755102  0.0  0.500  0.555556  0.779412  0.575916
Chris Lynn      0.673469  0.0  0.500  0.555556  0.529412  0.500000
David Warner    1.000000  1.0  1.000  0.444444  0.794118  1.000000
Faf Du Plessis  0.571429  0.0  0.375  0.444444  0.735294  0.581152
Jonny Bairstow  0.816327  1.0  0.250  0.222222  1.000000  0.481675
Jos Buttler     0.612245  0.0  0.375  0.000000  0.632353  0.277487
Kane Williamson 0.081633  0.0  0.125  0.111111  0.352941  0.081152
Kieron Pollard  0.122449  0.0  0.125  0.888889  0.544118  0.206806
Marcus Stoinis  0.122449  0.0  0.000  0.222222  0.000000  0.149215
Moeen Ali       0.163265  0.0  0.250  0.333333  0.294118  0.089005
Quinton de Kock 0.755102  0.0  0.500  0.888889  0.514706  0.782723
Shane Watson    0.693878  0.0  0.375  1.000000  0.735294  0.557592
Steve Smith     0.448980  0.0  0.375  0.444444  0.397059  0.460733

```

### 1.3 Step 2 - Calculating the Weighted Normalized Ratings

$$v_{ij} = w_j r_{ij}$$

where  $i = 1, 2, \dots, m$  and  $j = 1, 2, \dots, n$ .

```
[8]: raw_data *= weights
pd.DataFrame(data=raw_data, index=candidates, columns=attributes)
```

```
[8]:
```

|                 | SR       | Avg      | Runs     | Inn      | NO       | 6s \     |
|-----------------|----------|----------|----------|----------|----------|----------|
| AB de Villiers  | 0.065828 | 0.068631 | 0.071876 | 0.064103 | 0.051282 | 0.041132 |
| Andre Russel    | 0.153846 | 0.104741 | 0.087198 | 0.064103 | 0.068376 | 0.089744 |
| Ben Stokes      | 0.014274 | 0.000000 | 0.000000 | 0.012821 | 0.051282 | 0.000000 |
| Chris Gayle     | 0.065135 | 0.058872 | 0.082691 | 0.064103 | 0.017094 | 0.056090 |
| Chris Lynn      | 0.040969 | 0.030840 | 0.063539 | 0.064103 | 0.000000 | 0.033654 |
| David Warner    | 0.048262 | 0.141026 | 0.128205 | 0.051282 | 0.034188 | 0.031784 |
| Faf Du Plessis  | 0.012750 | 0.044885 | 0.061511 | 0.051282 | 0.017094 | 0.020566 |
| Jonny Bairstow  | 0.071440 | 0.101730 | 0.072552 | 0.025641 | 0.034188 | 0.026175 |
| Jos Buttler     | 0.061843 | 0.053225 | 0.042360 | 0.000000 | 0.000000 | 0.018697 |
| Kane Williamson | 0.006929 | 0.005183 | 0.007435 | 0.012821 | 0.034188 | 0.001870 |
| Kieron Pollard  | 0.070574 | 0.041642 | 0.035149 | 0.076923 | 0.102564 | 0.033654 |
| Marcus Stoinis  | 0.033347 | 0.093390 | 0.019828 | 0.025641 | 0.102564 | 0.011218 |
| Moeen Ali       | 0.085593 | 0.020271 | 0.021856 | 0.025641 | 0.034188 | 0.024306 |
| Quinton de Kock | 0.029293 | 0.042771 | 0.091479 | 0.102564 | 0.017094 | 0.039263 |
| Shane Watson    | 0.020025 | 0.008427 | 0.061962 | 0.115385 | 0.000000 | 0.029915 |
| Steve Smith     | 0.000000 | 0.056121 | 0.044162 | 0.025641 | 0.034188 | 0.000000 |

  

|                 | 4s       | 100s     | 50s      | Mat      | HS       | BF       |
|-----------------|----------|----------|----------|----------|----------|----------|
| AB de Villiers  | 0.036107 | 0.000000 | 0.032051 | 0.021368 | 0.013575 | 0.006310 |
| Andre Russel    | 0.036107 | 0.000000 | 0.025641 | 0.025641 | 0.012821 | 0.005034 |
| Ben Stokes      | 0.000000 | 0.000000 | 0.000000 | 0.004274 | 0.000000 | 0.000000 |
| Chris Gayle     | 0.058085 | 0.000000 | 0.025641 | 0.021368 | 0.019985 | 0.007384 |
| Chris Lynn      | 0.051805 | 0.000000 | 0.025641 | 0.021368 | 0.013575 | 0.006410 |
| David Warner    | 0.076923 | 0.064103 | 0.051282 | 0.017094 | 0.020362 | 0.012821 |
| Faf Du Plessis  | 0.043956 | 0.000000 | 0.019231 | 0.017094 | 0.018854 | 0.007451 |
| Jonny Bairstow  | 0.062794 | 0.064103 | 0.012821 | 0.008547 | 0.025641 | 0.006175 |
| Jos Buttler     | 0.047096 | 0.000000 | 0.019231 | 0.000000 | 0.016214 | 0.003558 |
| Kane Williamson | 0.006279 | 0.000000 | 0.006410 | 0.004274 | 0.009050 | 0.001040 |
| Kieron Pollard  | 0.009419 | 0.000000 | 0.006410 | 0.034188 | 0.013952 | 0.002651 |
| Marcus Stoinis  | 0.009419 | 0.000000 | 0.000000 | 0.008547 | 0.000000 | 0.001913 |
| Moeen Ali       | 0.012559 | 0.000000 | 0.012821 | 0.012821 | 0.007541 | 0.001141 |
| Quinton de Kock | 0.058085 | 0.000000 | 0.025641 | 0.034188 | 0.013198 | 0.010035 |
| Shane Watson    | 0.053375 | 0.000000 | 0.019231 | 0.038462 | 0.018854 | 0.007149 |
| Steve Smith     | 0.034537 | 0.000000 | 0.019231 | 0.017094 | 0.010181 | 0.005907 |

#### 1.4 Step 3 - Identifying PIS ( $A^*$ ) and NIS ( $A^-$ )

$$A^* = \{w_1, w_2, \dots, w_n\}$$

$$A^- = \{0, 0, \dots, 0\}$$

```
[9]: a_pos = np.copy(weights)
a_neg = np.zeros(n)
```

```
pd.DataFrame(data=[a_pos, a_neg], index=["$A^*$", "$A^-"], columns=attributes)
```

```
[9]:
```

|         | SR       | Avg      | Runs     | Inn      | NO       | 6s       | 4s \     |
|---------|----------|----------|----------|----------|----------|----------|----------|
| \$A^*\$ | 0.153846 | 0.141026 | 0.128205 | 0.115385 | 0.102564 | 0.089744 | 0.076923 |
| \$A^-   | 0.000000 | 0.000000 | 0.000000 | 0.000000 | 0.000000 | 0.000000 | 0.000000 |

  

|         | 100s     | 50s      | Mat      | HS       | BF       |
|---------|----------|----------|----------|----------|----------|
| \$A^*\$ | 0.064103 | 0.051282 | 0.038462 | 0.025641 | 0.012821 |
| \$A^-   | 0.000000 | 0.000000 | 0.000000 | 0.000000 | 0.000000 |

### 1.5 Step 4 and 5 - Calculating Separation Measures and Similarities to PIS

The separation or distance between the alternatives can be measured by the  $n$ -dimensional Euclidean distance. The separation from the PIS  $A^*$  and NIS  $A^-$  are  $S^*$  and  $S^-$  respectively.

$$S_i^* = \sqrt{\sum_{j=1}^n (v_{ij} - v_j^*)^2}$$

$$S_i^- = \sqrt{\sum_{j=1}^n (v_{ij} - v_j^-)^2}$$

where  $i = 1, 2, \dots, m$  and  $j = 1, 2, \dots, n$ .

We also calculate

$$C_i^* = \frac{S_i^-}{S_i^* + S_i^-}, \text{ where } i = 1, 2, \dots, m$$

```
[10]:
```

```
sp = np.zeros(m)
sn = np.zeros(m)
cs = np.zeros(m)

for i in range(m):
    diff_pos = raw_data[i] - a_pos
    diff_neg = raw_data[i] - a_neg
    sp[i] = np.sqrt(diff_pos @ diff_pos)
    sn[i] = np.sqrt(diff_neg @ diff_neg)
    cs[i] = sn[i] / (sp[i] + sn[i])

pd.DataFrame(data=zip(sp, sn, cs), index=candidates, columns=["$S^*$", "$S^-",
    ↪ "$C^*$"])
```

```
[10]:
```

|                | \$S^*\$  | \$S^-    | \$C^*\$  |
|----------------|----------|----------|----------|
| AB de Villiers | 0.174382 | 0.160163 | 0.478748 |
| Andre Russel   | 0.116700 | 0.248776 | 0.680691 |
| Ben Stokes     | 0.302746 | 0.054920 | 0.153552 |

|                 |          |          |          |
|-----------------|----------|----------|----------|
| Chris Gayle     | 0.182300 | 0.164425 | 0.474222 |
| Chris Lynn      | 0.226352 | 0.126221 | 0.357999 |
| David Warner    | 0.154195 | 0.238726 | 0.607567 |
| Faf Du Plessis  | 0.237810 | 0.110955 | 0.318137 |
| Jonny Bairstow  | 0.175557 | 0.179480 | 0.505525 |
| Jos Buttler     | 0.245161 | 0.108004 | 0.305817 |
| Kane Williamson | 0.300392 | 0.040603 | 0.119072 |
| Kieron Pollard  | 0.202568 | 0.164377 | 0.447960 |
| Marcus Stoinis  | 0.236055 | 0.147292 | 0.384226 |
| Moeen Ali       | 0.241691 | 0.105719 | 0.304306 |
| Quinton de Kock | 0.204539 | 0.169953 | 0.453822 |
| Shane Watson    | 0.244431 | 0.153702 | 0.386057 |
| Steve Smith     | 0.257682 | 0.094443 | 0.268208 |

## 1.6 Step 6 - Ranking the candidates/alternatives

We choose the candidate with the maximum  $C^*$  or rank all the alternatives in descending order according to their  $C^*$  values. This process can also be done for the  $S^*$  and  $S^-$  values.

```
[11]: def rank_according_to(data):
        ranks = (rankdata(data) - 1).astype(int)
        storage = np.zeros_like(candidates)
        storage[ranks] = candidates
        return storage[::-1]
```

```
[12]: cs_order = rank_according_to(cs)
        sp_order = rank_according_to(sp)
        sn_order = rank_according_to(sn)

        pd.DataFrame(data=zip(cs_order, sp_order[::-1], sn_order), index=range(1, m + 1),
            columns=["$C^*$$", "$S^*$$", "$S^-$$"])
```

```
[12]:          $C^*$$          $S^*$$          $S^-$$
1      Andre Russel      Andre Russel      Andre Russel
2      David Warner      David Warner      David Warner
3      Jonny Bairstow      AB de Villiers      Jonny Bairstow
4      AB de Villiers      Jonny Bairstow      Quinton de Kock
5      Chris Gayle      Chris Gayle      Chris Gayle
6      Quinton de Kock      Kieron Pollard      Kieron Pollard
7      Kieron Pollard      Quinton de Kock      AB de Villiers
8      Shane Watson      Chris Lynn      Shane Watson
9      Marcus Stoinis      Marcus Stoinis      Marcus Stoinis
10     Chris Lynn      Faf Du Plessis      Chris Lynn
11     Faf Du Plessis      Moeen Ali      Faf Du Plessis
12     Jos Buttler      Shane Watson      Jos Buttler
13     Moeen Ali      Jos Buttler      Moeen Ali
```

```
14      Steve Smith      Steve Smith      Steve Smith
15      Ben Stokes Kane Williamson      Ben Stokes
16 Kane Williamson      Ben Stokes Kane Williamson
```

```
[13]: print("The best candidate/alternative according to C* is " + cs_order[0])
      print("The preferences in descending order are " + ", ".join(cs_order) + ".")
```

```
The best candidate/alternative according to C* is Andre Russel
The preferences in descending order are Andre Russel, David Warner, Jonny
Bairstow, AB de Villiers, Chris Gayle, Quinton de Kock, Kieron Pollard, Shane
Watson, Marcus Stoinis, Chris Lynn, Faf Du Plessis, Jos Buttler, Moeen Ali,
Steve Smith, Ben Stokes, Kane Williamson.
```



# NR TOPSIS Ranking

August 9, 2021

## 1 TOPSIS Ranking

```
[1]: import numpy as np           # for linear algebra
import pandas as pd           # for tabular output
from scipy.stats import rankdata # for ranking the candidates
```

### 1.1 Step 0 - Obtaining and processing the data

The data from the Excel sheet is saved into CSV files and stored in the `data` folder at the root of the project. The criteria, their rankings, the players' scores based on the mentioned criteria are stored in Numpy arrays and processed for the next step.

Note that an attribute can be beneficial attribute (in which case, we will want to maximize it's contribution) or a cost attribute (which we will need to minimize). We call the set of beneficial attributes  $J_1$  and that of cost attributes  $J_2 = J_1^C$ .

```
[2]: bowlers_data = {
      'weights': '../data/bowling_criteria.csv',
      'scores': '../data/bowlers.csv',
    }
batsmen_data = {
      'weights': '../data/batting_criteria.csv',
      'scores': '../data/batsmen.csv',
    }
data = bowlers_data
```

```
[3]: attributes_data = pd.read_csv(data['weights'])
attributes_data
```

```
[3]:
```

|   | Name | Ranking | Ideally |
|---|------|---------|---------|
| 0 | SR   | 1       | Lower   |
| 1 | Econ | 2       | Lower   |
| 2 | Avg  | 3       | Lower   |
| 3 | Wkts | 4       | Higher  |
| 4 | Runs | 5       | Lower   |
| 5 | Inns | 6       | Higher  |
| 6 | TBB  | 7       | Higher  |
| 7 | 4w   | 8       | Higher  |

8 Mat            9 Higher

```
[4]: benefit_attributes = set()
attributes = []
ranks = []
n = 0

for i, row in attributes_data.iterrows():
    attributes.append(row['Name'])
    ranks.append(float(row['Ranking']))
    n += 1

    if row['Ideally'] == 'Higher':
        benefit_attributes.add(i)

ranks = np.array(ranks)
```

```
[5]: weights = 2 * (n + 1 - ranks) / (n * (n + 1))
pd.DataFrame(data=weights, index=attributes, columns=['Weight'])
```

```
[5]:          Weight
SR      0.200000
Econ    0.177778
Avg     0.155556
Wkts    0.133333
Runs    0.111111
Inns    0.088889
TBB     0.066667
4w      0.044444
Mat     0.022222
```

```
[6]: original_dataframe = pd.read_csv(data['scores'])
candidates = original_dataframe['Name'].to_numpy()
raw_data = pd.DataFrame(original_dataframe, columns=attributes).to_numpy()

dimensions = raw_data.shape
m = dimensions[0]
n = dimensions[1]

pd.DataFrame(data=raw_data, index=candidates, columns=attributes)
```

```
[6]:          SR   Econ   Avg   Wkts   Runs   Inns   TBB   4w   Mat
Andre Russell  16.45   9.51  26.09  11.0  287.0  12.0  181.0  0.0  14.0
Ben Stokes    16.83  11.23  31.50   6.0  189.0   6.0  101.0  0.0   9.0
Chris Morris  15.23   9.27  23.54  13.0  306.0   9.0  198.0  0.0   9.0
Dwayne Bravo  22.45   8.02  30.00  11.0  330.0  12.0  247.0  0.0  12.0
Imran Tahir   14.85   6.70  16.58  26.0  431.0  17.0  386.0  2.0  17.0
```

|                |       |      |       |      |       |      |       |     |      |
|----------------|-------|------|-------|------|-------|------|-------|-----|------|
| Jofra Archer   | 23.45 | 6.77 | 26.45 | 11.0 | 291.0 | 11.0 | 258.0 | 0.0 | 11.0 |
| Kagiso Rabada  | 11.28 | 7.83 | 14.72 | 25.0 | 368.0 | 12.0 | 282.0 | 2.0 | 12.0 |
| Keemo Paul     | 18.11 | 8.72 | 26.33 | 9.0  | 237.0 | 8.0  | 163.0 | 0.0 | 8.0  |
| Lasith Malinga | 16.81 | 9.77 | 27.38 | 16.0 | 438.0 | 12.0 | 269.0 | 2.0 | 12.0 |
| Moeen Ali      | 25.00 | 6.76 | 28.17 | 6.0  | 169.0 | 9.0  | 150.0 | 0.0 | 11.0 |
| Mohammad Nabi  | 21.88 | 6.65 | 24.25 | 8.0  | 194.0 | 8.0  | 175.0 | 1.0 | 8.0  |
| Rashid Khan    | 21.18 | 6.28 | 22.18 | 17.0 | 377.0 | 15.0 | 360.0 | 0.0 | 15.0 |
| Sam Curran     | 19.80 | 9.79 | 32.30 | 10.0 | 323.0 | 9.0  | 198.0 | 1.0 | 9.0  |
| Sunil Narine   | 26.60 | 7.83 | 34.70 | 10.0 | 347.0 | 12.0 | 266.0 | 0.0 | 12.0 |
| Trent Boult    | 22.80 | 8.58 | 32.60 | 5.0  | 163.0 | 5.0  | 114.0 | 0.0 | 5.0  |

## 1.2 Step 1 - Normalizing the ratings

$$r_{ij} = \begin{cases} \frac{x_{ij} - \min_j}{\max_j - \min_j} & \text{if } j \in J_1 \\ \frac{\max_j - x_{ij}}{\max_j - \min_j} & \text{if } j \in J_2 \end{cases}$$

where  $i = 1, 2, \dots, m$  and  $j = 1, 2, \dots, n$ .

```
[7]: for j in range(n):
      column = raw_data[:,j]
      min_val = np.min(column)
      max_val = np.max(column)
      denom = max_val - min_val
      if j in benefit_attributes:
          raw_data[:,j] = (raw_data[:,j] - min_val) / denom
      else:
          raw_data[:,j] = (max_val - raw_data[:,j]) / denom

pd.DataFrame(data=raw_data, index=candidates, columns=attributes)
```

```
[7]:          SR      Econ      Avg      Wkts      Runs      Inns \
Andre Russell  0.662533  0.347475  0.430931  0.285714  0.549091  0.583333
Ben Stokes    0.637728  0.000000  0.160160  0.047619  0.905455  0.083333
Chris Morris  0.742167  0.395960  0.558559  0.380952  0.480000  0.333333
Dwayne Bravo  0.270888  0.648485  0.235235  0.285714  0.392727  0.583333
Imran Tahir   0.766971  0.915152  0.906907  1.000000  0.025455  1.000000
Jofra Archer  0.205614  0.901010  0.412913  0.285714  0.534545  0.500000
Kagiso Rabada 1.000000  0.686869  1.000000  0.952381  0.254545  0.583333
Keemo Paul    0.554178  0.507071  0.418919  0.190476  0.730909  0.250000
Lasith Malinga 0.639034  0.294949  0.366366  0.523810  0.000000  0.583333
Moeen Ali     0.104439  0.903030  0.326827  0.047619  0.978182  0.333333
Mohammad Nabi 0.308094  0.925253  0.523023  0.142857  0.887273  0.250000
Rashid Khan   0.353786  1.000000  0.626627  0.571429  0.221818  0.833333
Sam Curran    0.443864  0.290909  0.120120  0.238095  0.418182  0.333333
Sunil Narine  0.000000  0.686869  0.000000  0.238095  0.330909  0.583333
Trent Boult   0.248042  0.535354  0.105105  0.000000  1.000000  0.000000
```

|                | TBB      | 4w  | Mat      |
|----------------|----------|-----|----------|
| Andre Russell  | 0.280702 | 0.0 | 0.750000 |
| Ben Stokes     | 0.000000 | 0.0 | 0.333333 |
| Chris Morris   | 0.340351 | 0.0 | 0.333333 |
| Dwayne Bravo   | 0.512281 | 0.0 | 0.583333 |
| Imran Tahir    | 1.000000 | 1.0 | 1.000000 |
| Jofra Archer   | 0.550877 | 0.0 | 0.500000 |
| Kagiso Rabada  | 0.635088 | 1.0 | 0.583333 |
| Keemo Paul     | 0.217544 | 0.0 | 0.250000 |
| Lasith Malinga | 0.589474 | 1.0 | 0.583333 |
| Moeen Ali      | 0.171930 | 0.0 | 0.500000 |
| Mohammad Nabi  | 0.259649 | 0.5 | 0.250000 |
| Rashid Khan    | 0.908772 | 0.0 | 0.833333 |
| Sam Curran     | 0.340351 | 0.5 | 0.333333 |
| Sunil Narine   | 0.578947 | 0.0 | 0.583333 |
| Trent Boult    | 0.045614 | 0.0 | 0.000000 |

### 1.3 Step 2 - Calculating the Weighted Normalized Ratings

$$v_{ij} = w_j r_{ij}$$

where  $i = 1, 2, \dots, m$  and  $j = 1, 2, \dots, n$ .

```
[8]: raw_data *= weights
      pd.DataFrame(data=raw_data, index=candidates, columns=attributes)
```

| [8]:           | SR       | Econ     | Avg      | Wkts     | Runs     | Inns     | \ |
|----------------|----------|----------|----------|----------|----------|----------|---|
| Andre Russell  | 0.132507 | 0.061773 | 0.067034 | 0.038095 | 0.061010 | 0.051852 |   |
| Ben Stokes     | 0.127546 | 0.000000 | 0.024914 | 0.006349 | 0.100606 | 0.007407 |   |
| Chris Morris   | 0.148433 | 0.070393 | 0.086887 | 0.050794 | 0.053333 | 0.029630 |   |
| Dwayne Bravo   | 0.054178 | 0.115286 | 0.036592 | 0.038095 | 0.043636 | 0.051852 |   |
| Imran Tahir    | 0.153394 | 0.162694 | 0.141074 | 0.133333 | 0.002828 | 0.088889 |   |
| Jofra Archer   | 0.041123 | 0.160180 | 0.064231 | 0.038095 | 0.059394 | 0.044444 |   |
| Kagiso Rabada  | 0.200000 | 0.122110 | 0.155556 | 0.126984 | 0.028283 | 0.051852 |   |
| Keemo Paul     | 0.110836 | 0.090146 | 0.065165 | 0.025397 | 0.081212 | 0.022222 |   |
| Lasith Malinga | 0.127807 | 0.052435 | 0.056990 | 0.069841 | 0.000000 | 0.051852 |   |
| Moeen Ali      | 0.020888 | 0.160539 | 0.050840 | 0.006349 | 0.108687 | 0.029630 |   |
| Mohammad Nabi  | 0.061619 | 0.164489 | 0.081359 | 0.019048 | 0.098586 | 0.022222 |   |
| Rashid Khan    | 0.070757 | 0.177778 | 0.097475 | 0.076190 | 0.024646 | 0.074074 |   |
| Sam Curran     | 0.088773 | 0.051717 | 0.018685 | 0.031746 | 0.046465 | 0.029630 |   |
| Sunil Narine   | 0.000000 | 0.122110 | 0.000000 | 0.031746 | 0.036768 | 0.051852 |   |
| Trent Boult    | 0.049608 | 0.095174 | 0.016350 | 0.000000 | 0.111111 | 0.000000 |   |

  

|               | TBB      | 4w       | Mat      |
|---------------|----------|----------|----------|
| Andre Russell | 0.018713 | 0.000000 | 0.016667 |
| Ben Stokes    | 0.000000 | 0.000000 | 0.007407 |
| Chris Morris  | 0.022690 | 0.000000 | 0.007407 |
| Dwayne Bravo  | 0.034152 | 0.000000 | 0.012963 |

|                |          |          |          |
|----------------|----------|----------|----------|
| Imran Tahir    | 0.066667 | 0.044444 | 0.022222 |
| Jofra Archer   | 0.036725 | 0.000000 | 0.011111 |
| Kagiso Rabada  | 0.042339 | 0.044444 | 0.012963 |
| Keemo Paul     | 0.014503 | 0.000000 | 0.005556 |
| Lasith Malinga | 0.039298 | 0.044444 | 0.012963 |
| Moeen Ali      | 0.011462 | 0.000000 | 0.011111 |
| Mohammad Nabi  | 0.017310 | 0.022222 | 0.005556 |
| Rashid Khan    | 0.060585 | 0.000000 | 0.018519 |
| Sam Curran     | 0.022690 | 0.022222 | 0.007407 |
| Sunil Narine   | 0.038596 | 0.000000 | 0.012963 |
| Trent Boult    | 0.003041 | 0.000000 | 0.000000 |

### 1.4 Step 3 - Identifying PIS ( $A^*$ ) and NIS ( $A^-$ )

$$A^* = \{w_1, w_2, \dots, w_n\}$$

$$A^- = \{0, 0, \dots, 0\}$$

```
[9]: a_pos = np.copy(weights)
a_neg = np.zeros(n)

pd.DataFrame(data=[a_pos, a_neg], index=["$A^*$$", "$A^-$$"], columns=attributes)
```

```
[9]:      SR      Econ      Avg      Wkts      Runs      Inns      TBB  \
$A^*$$ 0.2  0.177778  0.155556  0.133333  0.111111  0.088889  0.066667
$A^-$$ 0.0  0.000000  0.000000  0.000000  0.000000  0.000000  0.000000

      4w      Mat
$A^*$$ 0.044444  0.022222
$A^-$$ 0.000000  0.000000
```

### 1.5 Step 4 and 5 - Calculating Separation Measures and Similarities to PIS

The separation or distance between the alternatives can be measured by the  $n$ -dimensional Euclidean distance. The separation from the PIS  $A^*$  and NIS  $A^-$  are  $S^*$  and  $S^-$  respectively.

$$S_i^* = \sqrt{\sum_{j=1}^n (v_{ij} - v_j^*)^2}$$

$$S_i^- = \sqrt{\sum_{j=1}^n (v_{ij} - v_j^-)^2}$$

where  $i = 1, 2, \dots, m$  and  $j = 1, 2, \dots, n$ .

We also calculate

$$C_i^* = \frac{S_i^-}{S_i^* + S_i^-}, \text{ where } i = 1, 2, \dots, m$$

```
[10]: sp = np.zeros(m)
sn = np.zeros(m)
cs = np.zeros(m)

for i in range(m):
    diff_pos = raw_data[i] - a_pos
    diff_neg = raw_data[i] - a_neg
    sp[i] = np.sqrt(diff_pos @ diff_pos)
    sn[i] = np.sqrt(diff_neg @ diff_neg)
    cs[i] = sn[i] / (sp[i] + sn[i])

pd.DataFrame(data=zip(sp, sn, cs), index=candidates, columns=["$S^*$", "$S^-*$",
↳ "$C^*$"])
```

```
[10]:
```

|                | $S^*$    | $S^-$    | $C^*$    |
|----------------|----------|----------|----------|
| Andre Russell  | 0.207621 | 0.185358 | 0.471674 |
| Ben Stokes     | 0.288852 | 0.164804 | 0.363279 |
| Chris Morris   | 0.191566 | 0.203492 | 0.515094 |
| Dwayne Bravo   | 0.239656 | 0.157935 | 0.397230 |
| Imran Tahir    | 0.119727 | 0.320159 | 0.727823 |
| Jofra Archer   | 0.224961 | 0.199751 | 0.470322 |
| Kagiso Rabada  | 0.109768 | 0.320403 | 0.744827 |
| Keemo Paul     | 0.213923 | 0.180645 | 0.457831 |
| Lasith Malinga | 0.221858 | 0.183265 | 0.452369 |
| Moeen Ali      | 0.261022 | 0.204400 | 0.439172 |
| Mohammad Nabi  | 0.213779 | 0.221073 | 0.508387 |
| Rashid Khan    | 0.181835 | 0.249050 | 0.577996 |
| Sam Curran     | 0.260104 | 0.126541 | 0.327279 |
| Sunil Narine   | 0.295574 | 0.147027 | 0.332188 |
| Trent Boult    | 0.284633 | 0.155375 | 0.353119 |

## 1.6 Step 6 - Ranking the candidates/alternatives

We choose the candidate with the maximum  $C^*$  or rank all the alternatives in descending order according to their  $C^*$  values. This process can also be done for the  $S^*$  and  $S^-$  values.

```
[11]: def rank_according_to(data):
ranks = (rankdata(data) - 1).astype(int)
storage = np.zeros_like(candidates)
storage[ranks] = candidates
return storage[::-1]
```

```
[12]: cs_order = rank_according_to(cs)
sp_order = rank_according_to(sp)
sn_order = rank_according_to(sn)

pd.DataFrame(data=zip(cs_order, sp_order[::-1], sn_order), index=range(1, m +
↳ 1),
```

```
columns=["$C*$", "$S*$", "$S~$"])
```

```
[12]:
```

|    | \$C*\$         | \$S*\$         | \$S~\$         |
|----|----------------|----------------|----------------|
| 1  | Kagiso Rabada  | Kagiso Rabada  | Kagiso Rabada  |
| 2  | Imran Tahir    | Imran Tahir    | Imran Tahir    |
| 3  | Rashid Khan    | Rashid Khan    | Rashid Khan    |
| 4  | Chris Morris   | Chris Morris   | Mohammad Nabi  |
| 5  | Mohammad Nabi  | Andre Russell  | Moeen Ali      |
| 6  | Andre Russell  | Mohammad Nabi  | Chris Morris   |
| 7  | Jofra Archer   | Keemo Paul     | Jofra Archer   |
| 8  | Keemo Paul     | Lasith Malinga | Andre Russell  |
| 9  | Lasith Malinga | Jofra Archer   | Lasith Malinga |
| 10 | Moeen Ali      | Dwayne Bravo   | Keemo Paul     |
| 11 | Dwayne Bravo   | Sam Curran     | Ben Stokes     |
| 12 | Ben Stokes     | Moeen Ali      | Dwayne Bravo   |
| 13 | Trent Boult    | Trent Boult    | Trent Boult    |
| 14 | Sunil Narine   | Ben Stokes     | Sunil Narine   |
| 15 | Sam Curran     | Sunil Narine   | Sam Curran     |

```
[13]: print("The best candidate/alternative according to C* is " + cs_order[0])  
print("The preferences in descending order are " + ", ".join(cs_order) + ".")
```

The best candidate/alternative according to C\* is Kagiso Rabada  
The preferences in descending order are Kagiso Rabada, Imran Tahir, Rashid Khan, Chris Morris, Mohammad Nabi, Andre Russell, Jofra Archer, Keemo Paul, Lasith Malinga, Moeen Ali, Dwayne Bravo, Ben Stokes, Trent Boult, Sunil Narine, Sam Curran.

# TODIM Ranking

May 28, 2021

## 1 TODIM Ranking

```
[1]: import math           # for sqrt and other functions
import numpy as np       # for linear algebra
import pandas as pd     # for tabular output
from scipy.stats import rankdata # for ranking the candidates
```

### 1.1 Step 0 - Obtaining and preprocessing data

```
[2]: bowlers_data = {
    'weights': '../data/bowling_criteria.csv',
    'scores': '../data/bowlers.csv',
}
batsmen_data = {
    'weights': '../data/batting_criteria.csv',
    'scores': '../data/batsmen.csv',
}
data = batsmen_data
```

```
[3]: attributes_data = pd.read_csv(data['weights'])
attributes_data
```

```
[3]:
```

|    | Name | Ranking | Ideally |
|----|------|---------|---------|
| 0  | SR   | 1       | Higher  |
| 1  | Avg  | 2       | Higher  |
| 2  | Runs | 3       | Higher  |
| 3  | Inn  | 4       | Higher  |
| 4  | NO   | 5       | Higher  |
| 5  | 6s   | 6       | Higher  |
| 6  | 4s   | 7       | Higher  |
| 7  | 100s | 8       | Higher  |
| 8  | 50s  | 9       | Higher  |
| 9  | Mat  | 10      | Higher  |
| 10 | HS   | 11      | Higher  |
| 11 | BF   | 12      | Higher  |



```
[4]: benefit_attributes = set()
attributes = []
ranks = []
n = 0

for i, row in attributes_data.iterrows():
    attributes.append(row['Name'])
    ranks.append(float(row['Ranking']))
    n += 1

    if row['Ideally'] == 'Higher':
        benefit_attributes.add(i)

ranks = np.array(ranks)
```

```
[5]: weights = 2 * (n + 1 - ranks) / (n * (n + 1))
pd.DataFrame(data=weights, index=attributes, columns=['Weight'])
```

```
[5]:
```

|      | Weight   |
|------|----------|
| SR   | 0.153846 |
| Avg  | 0.141026 |
| Runs | 0.128205 |
| Inn  | 0.115385 |
| NO   | 0.102564 |
| 6s   | 0.089744 |
| 4s   | 0.076923 |
| 100s | 0.064103 |
| 50s  | 0.051282 |
| Mat  | 0.038462 |
| HS   | 0.025641 |
| BF   | 0.012821 |

```
[6]: original_dataframe = pd.read_csv(data['scores'])
candidates = original_dataframe['Name'].to_numpy()
raw_data = pd.DataFrame(original_dataframe, columns=attributes).to_numpy()

dimensions = raw_data.shape
m = dimensions[0]
n = dimensions[1]

pd.DataFrame(data=raw_data, index=candidates, columns=attributes)
```

```
[6]:
```

|                | SR     | Avg   | Runs  | Inn  | NO  | 6s   | 4s   | 100s | 50s | Mat  | \ |
|----------------|--------|-------|-------|------|-----|------|------|------|-----|------|---|
| AB de Villiers | 154.00 | 44.20 | 442.0 | 13.0 | 3.0 | 26.0 | 31.0 | 0.0  | 5.0 | 13.0 |   |
| Andre Russel   | 204.81 | 56.67 | 510.0 | 13.0 | 4.0 | 52.0 | 31.0 | 0.0  | 4.0 | 14.0 |   |
| Ben Stokes     | 124.24 | 20.50 | 123.0 | 9.0  | 3.0 | 4.0  | 8.0  | 0.0  | 0.0 | 9.0  |   |
| Chris Gayle    | 153.60 | 40.83 | 490.0 | 13.0 | 1.0 | 34.0 | 45.0 | 0.0  | 4.0 | 13.0 |   |

|                 |        |       |       |      |     |      |      |     |     |      |
|-----------------|--------|-------|-------|------|-----|------|------|-----|-----|------|
| Chris Lynn      | 139.65 | 31.15 | 405.0 | 13.0 | 0.0 | 22.0 | 41.0 | 0.0 | 4.0 | 13.0 |
| David Warner    | 143.86 | 69.20 | 692.0 | 12.0 | 2.0 | 21.0 | 57.0 | 1.0 | 8.0 | 12.0 |
| Faf Du Plessis  | 123.36 | 36.00 | 396.0 | 12.0 | 1.0 | 15.0 | 36.0 | 0.0 | 3.0 | 12.0 |
| Jonny Bairstow  | 157.24 | 55.63 | 445.0 | 10.0 | 2.0 | 18.0 | 48.0 | 1.0 | 2.0 | 10.0 |
| Jos Buttler     | 151.70 | 38.88 | 311.0 | 8.0  | 0.0 | 14.0 | 38.0 | 0.0 | 3.0 | 8.0  |
| Kane Williamson | 120.00 | 22.29 | 156.0 | 9.0  | 2.0 | 5.0  | 12.0 | 0.0 | 1.0 | 9.0  |
| Kieron Pollard  | 156.74 | 34.88 | 279.0 | 14.0 | 6.0 | 22.0 | 14.0 | 0.0 | 1.0 | 16.0 |
| Marcus Stoinis  | 135.25 | 52.75 | 211.0 | 10.0 | 6.0 | 10.0 | 14.0 | 0.0 | 0.0 | 10.0 |
| Moeen Ali       | 165.41 | 27.50 | 220.0 | 10.0 | 2.0 | 17.0 | 16.0 | 0.0 | 2.0 | 11.0 |
| Quinton de Kock | 132.91 | 35.27 | 529.0 | 16.0 | 1.0 | 25.0 | 45.0 | 0.0 | 4.0 | 16.0 |
| Shane Watson    | 127.56 | 23.41 | 398.0 | 17.0 | 0.0 | 20.0 | 42.0 | 0.0 | 3.0 | 17.0 |
| Steve Smith     | 116.00 | 39.88 | 319.0 | 10.0 | 2.0 | 4.0  | 30.0 | 0.0 | 3.0 | 12.0 |

|                 | HS    | BF    |
|-----------------|-------|-------|
| AB de Villiers  | 82.0  | 287.0 |
| Andre Russel    | 80.0  | 249.0 |
| Ben Stokes      | 46.0  | 99.0  |
| Chris Gayle     | 99.0  | 319.0 |
| Chris Lynn      | 82.0  | 290.0 |
| David Warner    | 100.0 | 481.0 |
| Faf Du Plessis  | 96.0  | 321.0 |
| Jonny Bairstow  | 114.0 | 283.0 |
| Jos Buttler     | 89.0  | 205.0 |
| Kane Williamson | 70.0  | 130.0 |
| Kieron Pollard  | 83.0  | 178.0 |
| Marcus Stoinis  | 46.0  | 156.0 |
| Moeen Ali       | 66.0  | 133.0 |
| Quinton de Kock | 81.0  | 398.0 |
| Shane Watson    | 96.0  | 312.0 |
| Steve Smith     | 73.0  | 275.0 |

## 1.2 Step 1 - Normalizing the Ratings And Weights

$$P_{ij} = \begin{cases} \frac{x_{ij}}{\sum_{k=1}^m x_{kj}} & \text{if } j \in J_1 \\ \frac{x_{ij}}{\sum_{k=1}^m \frac{1}{x_{kj}}} & \text{if } j \in J_2 \end{cases}$$

$$w_{rc} = \frac{w_c}{w_r}$$

and  $w_r = \max \{w_c | c = 1, 2, \dots, n\}$

where  $i = 1, 2, \dots, m$  and  $j = 1, 2, \dots, n$ .

```
[7]: for j in range(n):
      column = raw_data[:,j]
      if j in benefit_attributes:
          raw_data[:,j] /= sum(column)
```

```

else:
    column = 1 / column
    raw_data[:,j] = column / sum(column)

pd.DataFrame(data=raw_data, index=candidates, columns=attributes)

```

```

[7]:

```

|                 | SR       | Avg      | Runs     | Inn      | NO       | 6s \     |
|-----------------|----------|----------|----------|----------|----------|----------|
| AB de Villiers  | 0.066773 | 0.070266 | 0.074587 | 0.068783 | 0.085714 | 0.084142 |
| Andre Russel    | 0.088803 | 0.090090 | 0.086061 | 0.068783 | 0.114286 | 0.168285 |
| Ben Stokes      | 0.053869 | 0.032589 | 0.020756 | 0.047619 | 0.085714 | 0.012945 |
| Chris Gayle     | 0.066599 | 0.064908 | 0.082686 | 0.068783 | 0.028571 | 0.110032 |
| Chris Lynn      | 0.060551 | 0.049520 | 0.068343 | 0.068783 | 0.000000 | 0.071197 |
| David Warner    | 0.062376 | 0.110009 | 0.116774 | 0.063492 | 0.057143 | 0.067961 |
| Faf Du Plessis  | 0.053488 | 0.057230 | 0.066824 | 0.063492 | 0.028571 | 0.048544 |
| Jonny Bairstow  | 0.068178 | 0.088436 | 0.075093 | 0.052910 | 0.057143 | 0.058252 |
| Jos Buttler     | 0.065775 | 0.061808 | 0.052481 | 0.042328 | 0.000000 | 0.045307 |
| Kane Williamson | 0.052031 | 0.035435 | 0.026325 | 0.047619 | 0.057143 | 0.016181 |
| Kieron Pollard  | 0.067961 | 0.055450 | 0.047081 | 0.074074 | 0.171429 | 0.071197 |
| Marcus Stoinis  | 0.058643 | 0.083858 | 0.035606 | 0.052910 | 0.171429 | 0.032362 |
| Moeen Ali       | 0.071720 | 0.043717 | 0.037125 | 0.052910 | 0.057143 | 0.055016 |
| Quinton de Kock | 0.057628 | 0.056070 | 0.089268 | 0.084656 | 0.028571 | 0.080906 |
| Shane Watson    | 0.055309 | 0.037215 | 0.067162 | 0.089947 | 0.000000 | 0.064725 |
| Steve Smith     | 0.050296 | 0.063398 | 0.053831 | 0.052910 | 0.057143 | 0.012945 |

|                 | 4s       | 100s | 50s      | Mat      | HS       | BF       |
|-----------------|----------|------|----------|----------|----------|----------|
| AB de Villiers  | 0.061024 | 0.0  | 0.106383 | 0.066667 | 0.062932 | 0.069728 |
| Andre Russel    | 0.061024 | 0.0  | 0.085106 | 0.071795 | 0.061397 | 0.060496 |
| Ben Stokes      | 0.015748 | 0.0  | 0.000000 | 0.046154 | 0.035303 | 0.024052 |
| Chris Gayle     | 0.088583 | 0.0  | 0.085106 | 0.066667 | 0.075979 | 0.077502 |
| Chris Lynn      | 0.080709 | 0.0  | 0.085106 | 0.066667 | 0.062932 | 0.070457 |
| David Warner    | 0.112205 | 0.5  | 0.170213 | 0.061538 | 0.076746 | 0.116861 |
| Faf Du Plessis  | 0.070866 | 0.0  | 0.063830 | 0.061538 | 0.073676 | 0.077988 |
| Jonny Bairstow  | 0.094488 | 0.5  | 0.042553 | 0.051282 | 0.087490 | 0.068756 |
| Jos Buttler     | 0.074803 | 0.0  | 0.063830 | 0.041026 | 0.068304 | 0.049806 |
| Kane Williamson | 0.023622 | 0.0  | 0.021277 | 0.046154 | 0.053722 | 0.031584 |
| Kieron Pollard  | 0.027559 | 0.0  | 0.021277 | 0.082051 | 0.063699 | 0.043246 |
| Marcus Stoinis  | 0.027559 | 0.0  | 0.000000 | 0.051282 | 0.035303 | 0.037901 |
| Moeen Ali       | 0.031496 | 0.0  | 0.042553 | 0.056410 | 0.050652 | 0.032313 |
| Quinton de Kock | 0.088583 | 0.0  | 0.085106 | 0.082051 | 0.062164 | 0.096696 |
| Shane Watson    | 0.082677 | 0.0  | 0.063830 | 0.087179 | 0.073676 | 0.075802 |
| Steve Smith     | 0.059055 | 0.0  | 0.063830 | 0.061538 | 0.056025 | 0.066812 |

```

[8]: max_weight = max(weights)
weights /= max_weight

pd.DataFrame(data=weights, index=attributes, columns=['Weight'])

```

```
[8]:      Weight
SR      1.000000
Avg     0.916667
Runs    0.833333
Inn     0.750000
NO      0.666667
6s      0.583333
4s      0.500000
100s    0.416667
50s     0.333333
Mat     0.250000
HS      0.166667
BF      0.083333
```

### 1.3 Step 2 - Calculating Dominance Degrees

For the contribution of each criteria, we have:

$$\Phi_c(A_i, A_j) = \begin{cases} \sqrt{\frac{(P_{ic} - P_{jc})w_{rc}}{\sum_{c=1}^n w_{rc}}} & \text{if } P_{ic} - P_{jc} > 0 \\ 0 & \text{if } P_{ic} - P_{jc} = 0 \\ -\frac{1}{\theta} \sqrt{\frac{(\sum_{c=1}^n w_{rc})(P_{jc} - P_{ic})}{w_{rc}}} & \text{if } P_{ic} - P_{jc} < 0 \end{cases}$$

Combining all contributions, we get the dominance degrees:

$$\delta(A_i, A_j) = \sum_{c=1}^n \Phi_c(A_i, A_j)$$

Here  $c = 1, 2, \dots, n$ ,  $i, j = 1, 2, \dots, m$ .

```
[9]: # The loss attenuation factor
theta = 1.0
```

```
[10]: phi = np.zeros((n, m, m))

weight_sum = sum(weights)

for c in range(n):
    for i in range(m):
        for j in range(m):
            pic = raw_data[i,c]
            pjc = raw_data[j,c]
            val = 0
            if pic > pjc:
                val = math.sqrt((pic - pjc) * weights[c] / weight_sum)
            if pic < pjc:
```

```

        val = -1.0 / theta * math.sqrt(weight_sum * (pjc - pic) /
↳weights[c])
        phi[c, i, j] = val

```

```

[11]: delta = np.zeros((m, m))
      for i in range(m):
          for j in range(m):
              delta[i,j] = sum(phi[:,i,j])

pd.DataFrame(data=delta, index=candidates, columns=candidates)

```

```

[11]:
      AB de Villiers  Andre Russel  Ben Stokes  Chris Gayle  \
AB de Villiers      0.000000    -2.863567    0.541653    -2.736826
Andre Russel        -1.432863     0.000000    0.680447    -2.185471
Ben Stokes          -8.636770    -9.667204    0.000000    -9.146171
Chris Gayle         -1.464281    -2.969557   -0.175313     0.000000
Chris Lynn          -2.701454    -3.741018   -0.417572    -3.823306
David Warner        -1.209961    -2.478412    0.286893    -0.915043
Faf Du Plessis     -3.656001    -4.732884   -0.356786    -3.705243
Jonny Bairstow     -3.131000    -4.366829    0.157937    -3.398367
Jos Buttler         -5.721169    -6.457348   -1.096931    -6.463471
Kane Williamson    -8.286399    -8.948843   -0.484118    -8.413792
Kieron Pollard     -4.391405    -5.261568    0.525750    -5.592233
Marcus Stoinis     -7.120193    -7.819790    0.373489    -7.790279
Moeen Ali          -7.067200    -8.058174   -0.172304    -7.215517
Quinton de Kock   -2.139380    -2.687265   -0.192804    -1.683666
Shane Watson       -3.144248    -4.090498   -0.432750    -3.807919
Steve Smith        -5.171623    -5.638931   -0.338728    -5.684441

      Chris Lynn  David Warner  Faf Du Plessis  Jonny Bairstow  \
AB de Villiers  -0.470107    -8.323082    -1.469548    -4.718239
Andre Russel    -1.227112    -8.352768    -1.751344    -4.861276
Ben Stokes      -8.182355   -13.270051    -7.802967   -10.830438
Chris Gayle      0.285547    -8.043642     0.118903    -4.553716
Chris Lynn       0.000000    -9.426578    -1.984101    -5.766008
David Warner     -0.167186     0.000000     0.639631    -0.486275
Faf Du Plessis  -2.293111    -9.522781     0.000000    -5.872369
Jonny Bairstow  -2.207302    -6.057709    -1.841390     0.000000
Jos Buttler     -4.292833   -11.468555    -4.064842    -8.271405
Kane Williamson -7.306546   -12.686198    -7.081497   -10.064896
Kieron Pollard  -3.562238    -9.797233    -4.159653    -7.506049
Marcus Stoinis  -6.826716   -12.139600    -6.384429    -9.027501
Moeen Ali       -6.017898   -11.455425    -5.522270    -7.842208
Quinton de Kock -0.034919    -8.317030    -0.465049    -5.084213
Shane Watson    -1.373950    -9.392831    -1.139287    -5.636553
Steve Smith     -4.242396   -10.580745    -3.466620    -6.795844

```

|                 | Jos Buttler | Kane Williamson | Kieron Pollard | Marcus Stoinis | \ |
|-----------------|-------------|-----------------|----------------|----------------|---|
| AB de Villiers  | -0.478668   | 0.563287        | -1.747245      | -0.811863      |   |
| Andre Russel    | -0.406260   | 0.668864        | -1.363234      | -0.227213      |   |
| Ben Stokes      | -6.242437   | -3.047484       | -7.635036      | -4.509206      |   |
| Chris Gayle     | 0.409858    | 0.014354        | -1.793310      | -1.094065      |   |
| Chris Lynn      | -0.686636   | -0.283309       | -2.544914      | -1.401158      |   |
| David Warner    | 0.574301    | 0.791753        | -1.890787      | -0.340003      |   |
| Faf Du Plessis  | -0.466721   | -0.110308       | -2.814779      | -1.472636      |   |
| Jonny Bairstow  | -0.088623   | 0.652716        | -2.297592      | -0.518570      |   |
| Jos Buttler     | 0.000000    | -0.965622       | -3.323164      | -2.234822      |   |
| Kane Williamson | -5.310323   | 0.000000        | -6.188112      | -3.995256      |   |
| Kieron Pollard  | -2.951892   | 0.470782        | 0.000000       | -0.161458      |   |
| Marcus Stoinis  | -4.712187   | -1.131119       | -4.804666      | 0.000000       |   |
| Moeen Ali       | -3.900915   | -0.055282       | -4.854388      | -2.047408      |   |
| Quinton de Kock | -0.542137   | -0.004426       | -1.384756      | -1.273152      |   |
| Shane Watson    | -0.422441   | -0.299606       | -1.951912      | -1.619388      |   |
| Steve Smith     | -1.879711   | 0.002998        | -3.729563      | -1.917626      |   |

|                 | Moeen Ali | Quinton de Kock | Shane Watson | Steve Smith |
|-----------------|-----------|-----------------|--------------|-------------|
| AB de Villiers  | 0.263601  | -3.177333       | -2.701426    | 0.402402    |
| Andre Russel    | 0.585822  | -3.176525       | -2.930901    | -0.184972   |
| Ben Stokes      | -5.279731 | -9.286885       | -8.464639    | -6.335553   |
| Chris Gayle     | -0.283686 | -2.311074       | -0.825192    | -0.137100   |
| Chris Lynn      | -0.675130 | -4.204480       | -2.472064    | -0.754139   |
| David Warner    | 0.431890  | -0.987474       | -0.655316    | 0.684438    |
| Faf Du Plessis  | -0.849702 | -4.643568       | -2.159345    | -0.519110   |
| Jonny Bairstow  | -0.049678 | -4.253256       | -2.720731    | -0.668040   |
| Jos Buttler     | -1.985314 | -6.235162       | -4.644032    | -2.984853   |
| Kane Williamson | -3.472313 | -8.463717       | -7.646521    | -5.268632   |
| Kieron Pollard  | -0.692945 | -5.152669       | -4.855014    | -3.049238   |
| Marcus Stoinis  | -2.986853 | -7.949185       | -7.297779    | -4.810067   |
| Moeen Ali       | 0.000000  | -7.394533       | -6.366026    | -4.321665   |
| Quinton de Kock | -0.407927 | 0.000000        | -0.962690    | -0.375253   |
| Shane Watson    | -0.952716 | -3.997976       | 0.000000     | -0.868611   |
| Steve Smith     | -0.833003 | -6.062567       | -4.729501    | 0.000000    |

#### 1.4 Step 3 - Calculate ratings from the normalised dominance degree values

$$\zeta_i = \frac{\sum_{j=1}^m \delta(A_i, A_j) - \delta_{\min}}{\delta_{\max} - \delta_{\min}}$$

where

$$\delta_{\min} = \min_i \sum_{j=1}^m \delta(A_i, A_j)$$

$$\delta_{\max} = \max_i \sum_{j=1}^m \delta(A_i, A_j)$$

and  $i, j = 1, 2, \dots, m$

```
[12]: delta_sums = np.zeros(m)
      for i in range(m):
          delta_sums[i] = sum(delta[i,:])
      pd.DataFrame(data=delta_sums, index=candidates, columns=['Sum'])
```

```
[12]:
```

|                 | Sum         |
|-----------------|-------------|
| AB de Villiers  | -27.726961  |
| Andre Russel    | -26.164804  |
| Ben Stokes      | -118.336927 |
| Chris Gayle     | -22.822275  |
| Chris Lynn      | -40.881867  |
| David Warner    | -5.721549   |
| Faf Du Plessis  | -43.175344  |
| Jonny Bairstow  | -30.788434  |
| Jos Buttler     | -70.209524  |
| Kane Williamson | -103.617163 |
| Kieron Pollard  | -56.137062  |
| Marcus Stoinis  | -90.426875  |
| Moeen Ali       | -82.291213  |
| Quinton de Kock | -25.554667  |
| Shane Watson    | -39.130688  |
| Steve Smith     | -61.068302  |

```
[13]: delta_min = min(delta_sums)
      delta_max = max(delta_sums)
      pd.DataFrame(data=[delta_min, delta_max], columns=['Value'], index=['Minimum',
      → 'Maximum'])
```

```
[13]:
```

|         | Value       |
|---------|-------------|
| Minimum | -118.336927 |
| Maximum | -5.721549   |

```
[14]: ratings = (delta_sums - delta_min) / (delta_max - delta_min)
      pd.DataFrame(data=ratings, index=candidates, columns=['Rating'])
```

```
[14]:
```

|                | Rating   |
|----------------|----------|
| AB de Villiers | 0.804597 |
| Andre Russel   | 0.818468 |
| Ben Stokes     | 0.000000 |
| Chris Gayle    | 0.848149 |
| Chris Lynn     | 0.687784 |
| David Warner   | 1.000000 |

|                 |          |
|-----------------|----------|
| Faf Du Plessis  | 0.667418 |
| Jonny Bairstow  | 0.777412 |
| Jos Buttler     | 0.427361 |
| Kane Williamson | 0.130708 |
| Kieron Pollard  | 0.552321 |
| Marcus Stoinis  | 0.247835 |
| Moeen Ali       | 0.320078 |
| Quinton de Kock | 0.823886 |
| Shane Watson    | 0.703334 |
| Steve Smith     | 0.508533 |

### 1.5 Step 4 - Create ranking based on the calculated $\zeta_i$ values

```
[15]: def rank_according_to(data):
      ranks = (rankdata(data) - 1).astype(int)
      storage = np.zeros_like(candidates)
      storage[ranks] = candidates
      return storage[:, -1]
```

```
[16]: result = rank_according_to(ratings)
      pd.DataFrame(data=result, index=range(1, m + 1), columns=['Name'])
```

```
[16]:
```

|    | Name            |
|----|-----------------|
| 1  | David Warner    |
| 2  | Chris Gayle     |
| 3  | Quinton de Kock |
| 4  | Andre Russel    |
| 5  | AB de Villiers  |
| 6  | Jonny Bairstow  |
| 7  | Shane Watson    |
| 8  | Chris Lynn      |
| 9  | Faf Du Plessis  |
| 10 | Kieron Pollard  |
| 11 | Steve Smith     |
| 12 | Jos Buttler     |
| 13 | Moeen Ali       |
| 14 | Marcus Stoinis  |
| 15 | Kane Williamson |
| 16 | Ben Stokes      |

```
[17]: print("The best candidate/alternative according to C* is " + result[0])
      print("The preferences in descending order are " + ", ".join(result) + ".")
```

The best candidate/alternative according to C\* is David Warner  
The preferences in descending order are David Warner, Chris Gayle, Quinton de Kock, Andre Russel, AB de Villiers, Jonny Bairstow, Shane Watson, Chris Lynn, Faf Du Plessis, Kieron Pollard, Steve Smith, Jos Buttler, Moeen Ali, Marcus



Stoinis, Kane Williamson, Ben Stokes.

# TODIM Ranking

May 28, 2021

## 1 TODIM Ranking

```
[1]: import math                # for sqrt and other functions
import numpy as np            # for linear algebra
import pandas as pd          # for tabular output
from scipy.stats import rankdata # for ranking the candidates
```

### 1.1 Step 0 - Obtaining and preprocessing data

```
[2]: bowlers_data = {
    'weights': '../data/bowling_criteria.csv',
    'scores': '../data/bowlers.csv',
}
batsmen_data = {
    'weights': '../data/batting_criteria.csv',
    'scores': '../data/batsmen.csv',
}
data = bowlers_data
```

```
[3]: attributes_data = pd.read_csv(data['weights'])
attributes_data
```

```
[3]:
```

|   | Name | Ranking | Ideally |
|---|------|---------|---------|
| 0 | SR   | 1       | Lower   |
| 1 | Econ | 2       | Lower   |
| 2 | Avg  | 3       | Lower   |
| 3 | Wkts | 4       | Higher  |
| 4 | Runs | 5       | Lower   |
| 5 | Inns | 6       | Higher  |
| 6 | TBB  | 7       | Higher  |
| 7 | 4w   | 8       | Higher  |
| 8 | Mat  | 9       | Higher  |

```
[4]: benefit_attributes = set()
attributes = []
ranks = []
n = 0
```

```

for i, row in attributes_data.iterrows():
    attributes.append(row['Name'])
    ranks.append(float(row['Ranking']))
    n += 1

    if row['Ideally'] == 'Higher':
        benefit_attributes.add(i)

ranks = np.array(ranks)

```

```

[5]: weights = 2 * (n + 1 - ranks) / (n * (n + 1))
pd.DataFrame(data=weights, index=attributes, columns=['Weight'])

```

```

[5]:          Weight
SR      0.200000
Econ    0.177778
Avg     0.155556
Wkts    0.133333
Runs    0.111111
Inns    0.088889
TBB     0.066667
4w      0.044444
Mat     0.022222

```

```

[6]: original_dataframe = pd.read_csv(data['scores'])
candidates = original_dataframe['Name'].to_numpy()
raw_data = pd.DataFrame(original_dataframe, columns=attributes).to_numpy()

dimensions = raw_data.shape
m = dimensions[0]
n = dimensions[1]

pd.DataFrame(data=raw_data, index=candidates, columns=attributes)

```

```

[6]:          SR    Econ    Avg    Wkts    Runs    Inns    TBB    4w    Mat
Andre Russell  16.45    9.51  26.09    11.0  287.0    12.0  181.0    0.0  14.0
Ben Stokes    16.83   11.23  31.50     6.0  189.0     6.0  101.0    0.0   9.0
Chris Morris  15.23    9.27  23.54    13.0  306.0     9.0  198.0    0.0   9.0
Dwayne Bravo  22.45    8.02  30.00    11.0  330.0    12.0  247.0    0.0  12.0
Imran Tahir   14.85    6.70  16.58    26.0  431.0    17.0  386.0     2.0  17.0
Jofra Archer  23.45    6.77  26.45    11.0  291.0    11.0  258.0    0.0  11.0
Kagiso Rabada 11.28    7.83  14.72    25.0  368.0    12.0  282.0     2.0  12.0
Keemo Paul    18.11    8.72  26.33     9.0  237.0     8.0  163.0    0.0   8.0
Lasith Malinga 16.81    9.77  27.38    16.0  438.0    12.0  269.0     2.0  12.0
Moeen Ali     25.00    6.76  28.17     6.0  169.0     9.0  150.0    0.0  11.0
Mohammad Nabi 21.88    6.65  24.25     8.0  194.0     8.0  175.0     1.0   8.0

```

|              |       |      |       |      |       |      |       |     |      |
|--------------|-------|------|-------|------|-------|------|-------|-----|------|
| Rashid Khan  | 21.18 | 6.28 | 22.18 | 17.0 | 377.0 | 15.0 | 360.0 | 0.0 | 15.0 |
| Sam Curran   | 19.80 | 9.79 | 32.30 | 10.0 | 323.0 | 9.0  | 198.0 | 1.0 | 9.0  |
| Sunil Narine | 26.60 | 7.83 | 34.70 | 10.0 | 347.0 | 12.0 | 266.0 | 0.0 | 12.0 |
| Trent Boult  | 22.80 | 8.58 | 32.60 | 5.0  | 163.0 | 5.0  | 114.0 | 0.0 | 5.0  |

## 1.2 Step 1 - Normalizing the Ratings And Weights

$$P_{ij} = \begin{cases} \frac{x_{ij}}{\sum_{k=1}^m x_{kj}} & \text{if } j \in J_1 \\ \frac{x_{ij}}{\sum_{k=1}^m \frac{1}{x_{kj}}} & \text{if } j \in J_2 \end{cases}$$

$$w_{rc} = \frac{w_c}{w_r}$$

and  $w_r = \max\{w_c | c = 1, 2, \dots, n\}$

where  $i = 1, 2, \dots, m$  and  $j = 1, 2, \dots, n$ .

```
[7]: for j in range(n):
      column = raw_data[:,j]
      if j in benefit_attributes:
          raw_data[:,j] /= sum(column)
      else:
          column = 1 / column
          raw_data[:,j] = column / sum(column)

pd.DataFrame(data=raw_data, index=candidates, columns=attributes)
```

```
[7]:
```

|                | SR       | Econ     | Avg      | Wkts     | Runs     | Inns     | \ |
|----------------|----------|----------|----------|----------|----------|----------|---|
| Andre Russell  | 0.075177 | 0.056158 | 0.064018 | 0.059783 | 0.062346 | 0.076433 |   |
| Ben Stokes     | 0.073479 | 0.047557 | 0.053023 | 0.032609 | 0.094673 | 0.038217 |   |
| Chris Morris   | 0.081199 | 0.057612 | 0.070953 | 0.070652 | 0.058474 | 0.057325 |   |
| Dwayne Bravo   | 0.055085 | 0.066592 | 0.055674 | 0.059783 | 0.054222 | 0.076433 |   |
| Imran Tahir    | 0.083277 | 0.079712 | 0.100737 | 0.141304 | 0.041515 | 0.108280 |   |
| Jofra Archer   | 0.052736 | 0.078887 | 0.063146 | 0.059783 | 0.061489 | 0.070064 |   |
| Kagiso Rabada  | 0.109633 | 0.068208 | 0.113466 | 0.135870 | 0.048623 | 0.076433 |   |
| Keemo Paul     | 0.068286 | 0.061246 | 0.063434 | 0.048913 | 0.075499 | 0.050955 |   |
| Lasith Malinga | 0.073567 | 0.054664 | 0.061002 | 0.086957 | 0.040852 | 0.076433 |   |
| Moeen Ali      | 0.049466 | 0.079004 | 0.059291 | 0.032609 | 0.105877 | 0.057325 |   |
| Mohammad Nabi  | 0.056520 | 0.080311 | 0.068875 | 0.043478 | 0.092233 | 0.050955 |   |
| Rashid Khan    | 0.058388 | 0.085043 | 0.075303 | 0.092391 | 0.047462 | 0.095541 |   |
| Sam Curran     | 0.062457 | 0.054552 | 0.051710 | 0.054348 | 0.055397 | 0.057325 |   |
| Sunil Narine   | 0.046491 | 0.068208 | 0.048133 | 0.054348 | 0.051565 | 0.076433 |   |
| Trent Boult    | 0.054239 | 0.062246 | 0.051234 | 0.027174 | 0.109774 | 0.031847 |   |

|               | TBB      | 4w    | Mat      |
|---------------|----------|-------|----------|
| Andre Russell | 0.054062 | 0.000 | 0.085366 |
| Ben Stokes    | 0.030167 | 0.000 | 0.054878 |

|                |          |       |          |
|----------------|----------|-------|----------|
| Chris Morris   | 0.059140 | 0.000 | 0.054878 |
| Dwayne Bravo   | 0.073775 | 0.000 | 0.073171 |
| Imran Tahir    | 0.115293 | 0.250 | 0.103659 |
| Jofra Archer   | 0.077061 | 0.000 | 0.067073 |
| Kagiso Rabada  | 0.084229 | 0.250 | 0.073171 |
| Keemo Paul     | 0.048686 | 0.000 | 0.048780 |
| Lasith Malinga | 0.080346 | 0.250 | 0.073171 |
| Moeen Ali      | 0.044803 | 0.000 | 0.067073 |
| Mohammad Nabi  | 0.052270 | 0.125 | 0.048780 |
| Rashid Khan    | 0.107527 | 0.000 | 0.091463 |
| Sam Curran     | 0.059140 | 0.125 | 0.054878 |
| Sunil Narine   | 0.079450 | 0.000 | 0.073171 |
| Trent Boult    | 0.034050 | 0.000 | 0.030488 |

```
[8]: max_weight = max(weights)
weights /= max_weight

pd.DataFrame(data=weights, index=attributes, columns=['Weight'])
```

```
[8]:      Weight
SR      1.000000
Econ    0.888889
Avg     0.777778
Wkts    0.666667
Runs    0.555556
Inns    0.444444
TBB     0.333333
4w      0.222222
Mat     0.111111
```

### 1.3 Step 2 - Calculating Dominance Degrees

For the contribution of each criteria, we have:

$$\Phi_c(A_i, A_j) = \begin{cases} \sqrt{\frac{(P_{ic} - P_{jc})w_{rc}}{\sum_{c=1}^n w_{rc}}} & \text{if } P_{ic} - P_{jc} > 0 \\ 0 & \text{if } P_{ic} - P_{jc} = 0 \\ -\frac{1}{\theta} \sqrt{\frac{(\sum_{c=1}^n w_{rc})(P_{jc} - P_{ic})}{w_{rc}}} & \text{if } P_{ic} - P_{jc} < 0 \end{cases}$$

Combining all contributions, we get the dominance degrees:

$$\delta(A_i, A_j) = \sum_{c=1}^n \Phi_c(A_i, A_j)$$

Here  $c = 1, 2, \dots, n$ ,  $i, j = 1, 2, \dots, m$ .

```
[9]: # The loss attenuation factor
theta = 1.0
```

```
[10]: phi = np.zeros((n, m, m))

weight_sum = sum(weights)

for c in range(n):
    for i in range(m):
        for j in range(m):
            pic = raw_data[i,c]
            pjc = raw_data[j,c]
            val = 0
            if pic > pjc:
                val = math.sqrt((pic - pjc) * weights[c] / weight_sum)
            if pic < pjc:
                val = -1.0 / theta * math.sqrt(weight_sum * (pic - pjc) /
↳weights[c])
            phi[c, i, j] = val
```

```
[11]: delta = np.zeros((m, m))
for i in range(m):
    for j in range(m):
        delta[i,j] = sum(phi[:,i,j])

pd.DataFrame(data=delta, index=candidates, columns=candidates)
```

```
[11]:
```

|                |               |              |               |              |   |
|----------------|---------------|--------------|---------------|--------------|---|
|                | Andre Russell | Ben Stokes   | Chris Morris  | Dwayne Bravo | \ |
| Andre Russell  | 0.000000      | -0.256091    | -0.948618     | -0.640115    |   |
| Ben Stokes     | -3.395140     | 0.000000     | -2.367408     | -3.153278    |   |
| Chris Morris   | -1.681511     | -0.280010    | 0.000000      | -1.883396    |   |
| Dwayne Bravo   | -1.480425     | -0.635606    | -1.023334     | 0.000000     |   |
| Imran Tahir    | 0.094481      | -0.072683    | 0.124330      | 0.210453     |   |
| Jofra Archer   | -1.569885     | -0.568460    | -0.722302     | -0.775823    |   |
| Kagiso Rabada  | -0.624253     | -0.039962    | 0.203299      | 0.224265     |   |
| Keemo Paul     | -2.566535     | -0.895393    | -1.996320     | -2.520664    |   |
| Lasith Malinga | -1.293810     | -0.294205    | -0.724292     | -0.329792    |   |
| Moeen Ali      | -2.594644     | -0.116315    | -1.519322     | -2.119307    |   |
| Mohammad Nabi  | -2.412364     | -0.652604    | -1.831497     | -2.249504    |   |
| Rashid Khan    | -0.363674     | -0.525040    | -0.359261     | 0.066327     |   |
| Sam Curran     | -2.622509     | -0.672382    | -1.230612     | -2.336888    |   |
| Sunil Narine   | -1.865025     | -0.917318    | -1.257069     | -0.747582    |   |
| Trent Boult    | -3.826860     | -1.826479    | -3.386515     | -3.672372    |   |
|                | Imran Tahir   | Jofra Archer | Kagiso Rabada | Keemo Paul   | \ |
| Andre Russell  | -6.620828     | -0.812562    | -4.983520     | -0.333476    |   |
| Ben Stokes     | -7.897602     | -3.179277    | -7.033048     | -1.701473    |   |

|                |           |           |           |           |
|----------------|-----------|-----------|-----------|-----------|
| Chris Morris   | -7.104803 | -2.000113 | -6.166372 | -0.333710 |
| Dwayne Bravo   | -6.860415 | -0.902784 | -4.725282 | -0.737200 |
| Imran Tahir    | 0.000000  | 0.089699  | -0.705105 | 0.024531  |
| Jofra Archer   | -6.753051 | 0.000000  | -5.267292 | -0.478002 |
| Kagiso Rabada  | -2.763542 | -0.126805 | 0.000000  | 0.055154  |
| Keemo Paul     | -7.602526 | -2.521952 | -6.657522 | 0.000000  |
| Lasith Malinga | -4.310707 | -0.637133 | -2.392892 | -0.549940 |
| Moeen Ali      | -7.248964 | -1.736133 | -6.023291 | -0.902745 |
| Mohammad Nabi  | -6.613377 | -2.124177 | -5.719613 | -0.224017 |
| Rashid Khan    | -5.138686 | -0.063239 | -3.890964 | -0.384254 |
| Sam Curran     | -6.862080 | -2.596379 | -5.808854 | -0.901349 |
| Sunil Narine   | -6.913739 | -1.185152 | -4.613248 | -0.929599 |
| Trent Boult    | -8.314198 | -3.728651 | -7.495802 | -2.713294 |

|                | Lasith Malinga | Moeen Ali | Mohammad Nabi | Rashid Khan | \ |
|----------------|----------------|-----------|---------------|-------------|---|
| Andre Russell  | -3.329825      | -0.739164 | -2.546245     | -2.951349   |   |
| Ben Stokes     | -5.810701      | -2.542547 | -3.579048     | -4.543259   |   |
| Chris Morris   | -4.510778      | -1.516449 | -2.380317     | -3.652038   |   |
| Dwayne Bravo   | -3.541567      | -0.908027 | -2.760399     | -3.355487   |   |
| Imran Tahir    | 0.410632       | -0.197184 | -0.230257     | -0.012023   |   |
| Jofra Archer   | -4.027618      | -0.467397 | -2.473359     | -3.347820   |   |
| Kagiso Rabada  | 0.350569       | -0.435901 | -0.398507     | -1.898623   |   |
| Keemo Paul     | -5.224812      | -1.864451 | -2.736070     | -4.146433   |   |
| Lasith Malinga | 0.000000       | -0.757209 | -0.961624     | -3.011334   |   |
| Moeen Ali      | -5.029017      | 0.000000  | -2.736111     | -3.978705   |   |
| Mohammad Nabi  | -4.593938      | -1.299065 | 0.000000      | -3.928230   |   |
| Rashid Khan    | -2.368579      | -0.364650 | -1.996668     | 0.000000    |   |
| Sam Curran     | -4.571475      | -1.796194 | -1.159252     | -3.995724   |   |
| Sunil Narine   | -3.554167      | -1.180616 | -2.980542     | -3.502250   |   |
| Trent Boult    | -6.406009      | -2.904881 | -4.638627     | -5.064456   |   |

|                | Sam Curran | Sunil Narine | Trent Boult |
|----------------|------------|--------------|-------------|
| Andre Russell  | -1.719993  | -0.674008    | -0.528739   |
| Ben Stokes     | -3.274775  | -2.997130    | -0.744730   |
| Chris Morris   | -1.472675  | -1.949796    | -0.524199   |
| Dwayne Bravo   | -1.781258  | -0.267294    | -0.428851   |
| Imran Tahir    | 0.208900   | 0.261912     | -0.138995   |
| Jofra Archer   | -1.651956  | -0.793466    | -0.442198   |
| Kagiso Rabada  | 0.278570   | 0.277966     | -0.128276   |
| Keemo Paul     | -2.907840  | -2.495736    | -0.387368   |
| Lasith Malinga | -0.032746  | -0.289125    | -0.548951   |
| Moeen Ali      | -2.607814  | -1.924619    | -0.121989   |
| Mohammad Nabi  | -1.387018  | -2.217326    | -0.049529   |
| Rashid Khan    | -1.737908  | 0.152185     | -0.319922   |
| Sam Curran     | 0.000000   | -2.024779    | -0.611952   |
| Sunil Narine   | -2.149481  | 0.000000     | -0.820291   |
| Trent Boult    | -4.468290  | -3.412196    | 0.000000    |

### 1.4 Step 3 - Calculate ratings from the normalised dominance degree values

$$\zeta_i = \frac{\sum_{j=1}^m \delta(A_i, A_j) - \delta_{\min}}{\delta_{\max} - \delta_{\min}}$$

where

$$\delta_{\min} = \min_i \sum_{j=1}^m \delta(A_i, A_j)$$

$$\delta_{\max} = \max_i \sum_{j=1}^m \delta(A_i, A_j)$$

and  $i, j = 1, 2, \dots, m$

```
[12]: delta_sums = np.zeros(m)
      for i in range(m):
          delta_sums[i] = sum(delta[i,:])
      pd.DataFrame(data=delta_sums, index=candidates, columns=['Sum'])
```

```
[12]:
```

|                | Sum        |
|----------------|------------|
| Andre Russell  | -27.084533 |
| Ben Stokes     | -52.219415 |
| Chris Morris   | -35.456166 |
| Dwayne Bravo   | -29.407928 |
| Imran Tahir    | 0.068690   |
| Jofra Archer   | -29.338628 |
| Kagiso Rabada  | -5.026045  |
| Keemo Paul     | -44.523623 |
| Lasith Malinga | -16.133760 |
| Moeen Ali      | -38.658977 |
| Mohammad Nabi  | -35.302259 |
| Rashid Khan    | -17.294333 |
| Sam Curran     | -37.190432 |
| Sunil Narine   | -32.616078 |
| Trent Boult    | -61.858631 |

```
[13]: delta_min = min(delta_sums)
      delta_max = max(delta_sums)
      pd.DataFrame(data=[delta_min, delta_max], columns=['Value'], index=['Minimum',
      ↪ 'Maximum'])
```

```
[13]:
```

|         | Value      |
|---------|------------|
| Minimum | -61.858631 |
| Maximum | 0.068690   |



```
[14]: ratings = (delta_sums - delta_min) / (delta_max - delta_min)
pd.DataFrame(data=ratings, index=candidates, columns=['Rating'])
```

```
[14]:
```

|                | Rating   |
|----------------|----------|
| Andre Russell  | 0.561531 |
| Ben Stokes     | 0.155654 |
| Chris Morris   | 0.426346 |
| Dwayne Bravo   | 0.524013 |
| Imran Tahir    | 1.000000 |
| Jofra Archer   | 0.525132 |
| Kagiso Rabada  | 0.917730 |
| Keemo Paul     | 0.279925 |
| Lasith Malinga | 0.738363 |
| Moeen Ali      | 0.374627 |
| Mohammad Nabi  | 0.428831 |
| Rashid Khan    | 0.719623 |
| Sam Curran     | 0.398341 |
| Sunil Narine   | 0.472208 |
| Trent Boult    | 0.000000 |

### 1.5 Step 4 - Create ranking based on the calculated $\zeta_i$ values

```
[15]: def rank_according_to(data):
ranks = (rankdata(data) - 1).astype(int)
storage = np.zeros_like(candidates)
storage[ranks] = candidates
return storage[::-1]
```

```
[16]: result = rank_according_to(ratings)
pd.DataFrame(data=result, index=range(1, m + 1), columns=['Name'])
```

```
[16]:
```

|    | Name           |
|----|----------------|
| 1  | Imran Tahir    |
| 2  | Kagiso Rabada  |
| 3  | Lasith Malinga |
| 4  | Rashid Khan    |
| 5  | Andre Russell  |
| 6  | Jofra Archer   |
| 7  | Dwayne Bravo   |
| 8  | Sunil Narine   |
| 9  | Mohammad Nabi  |
| 10 | Chris Morris   |
| 11 | Sam Curran     |
| 12 | Moeen Ali      |
| 13 | Keemo Paul     |
| 14 | Ben Stokes     |
| 15 | Trent Boult    |

```
[17]: print("The best candidate/alternative according to C* is " + result[0])
      print("The preferences in descending order are " + ", ".join(result) + ".")
```

The best candidate/alternative according to C\* is Imran Tahir  
The preferences in descending order are Imran Tahir, Kagiso Rabada, Lasith Malinga, Rashid Khan, Andre Russell, Jofra Archer, Dwayne Bravo, Sunil Narine, Mohammad Nabi, Chris Morris, Sam Curran, Moeen Ali, Keemo Paul, Ben Stokes, Trent Boult.
